# Supplementary material
Source: JCI journal article supplement (doi:10.1172/jci194700)

# Figure 2, M

The Image captured by the LICOR instrument processed using Image Studio Ver 5.2.

Uncropped/unedited images ↓

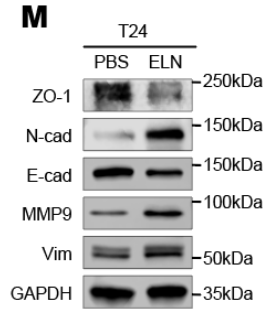

E-cadherin

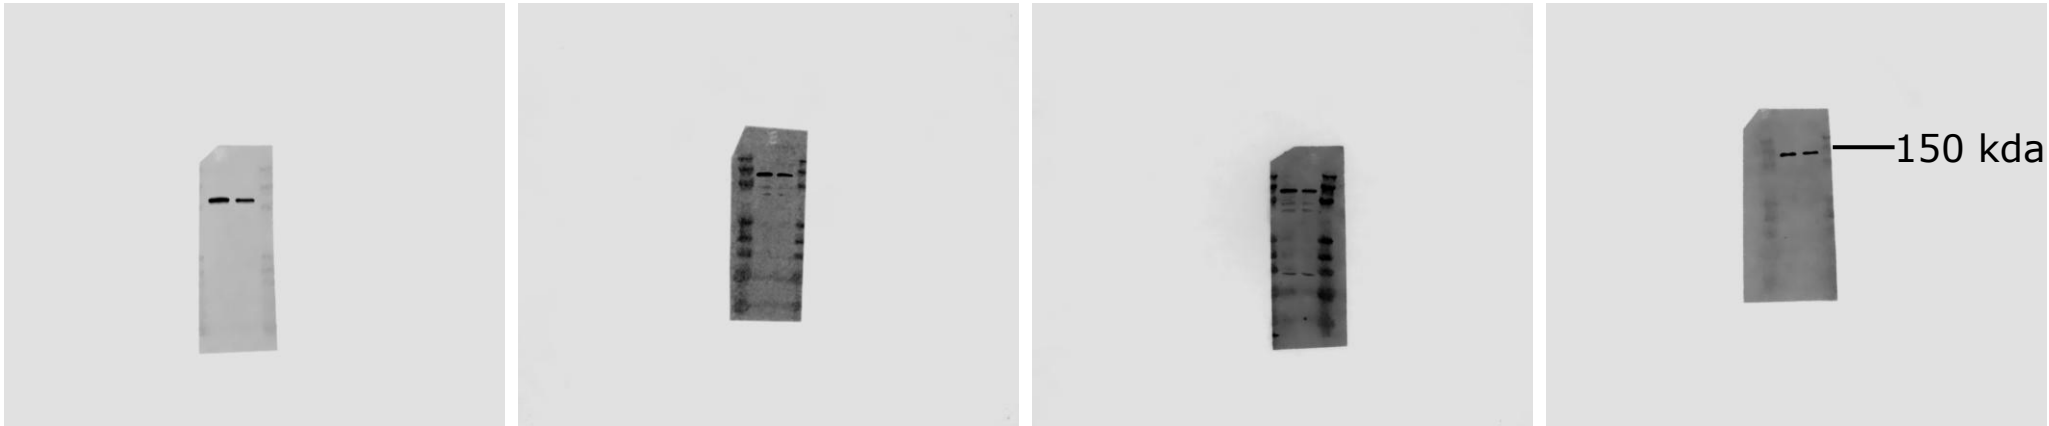

GAPDH

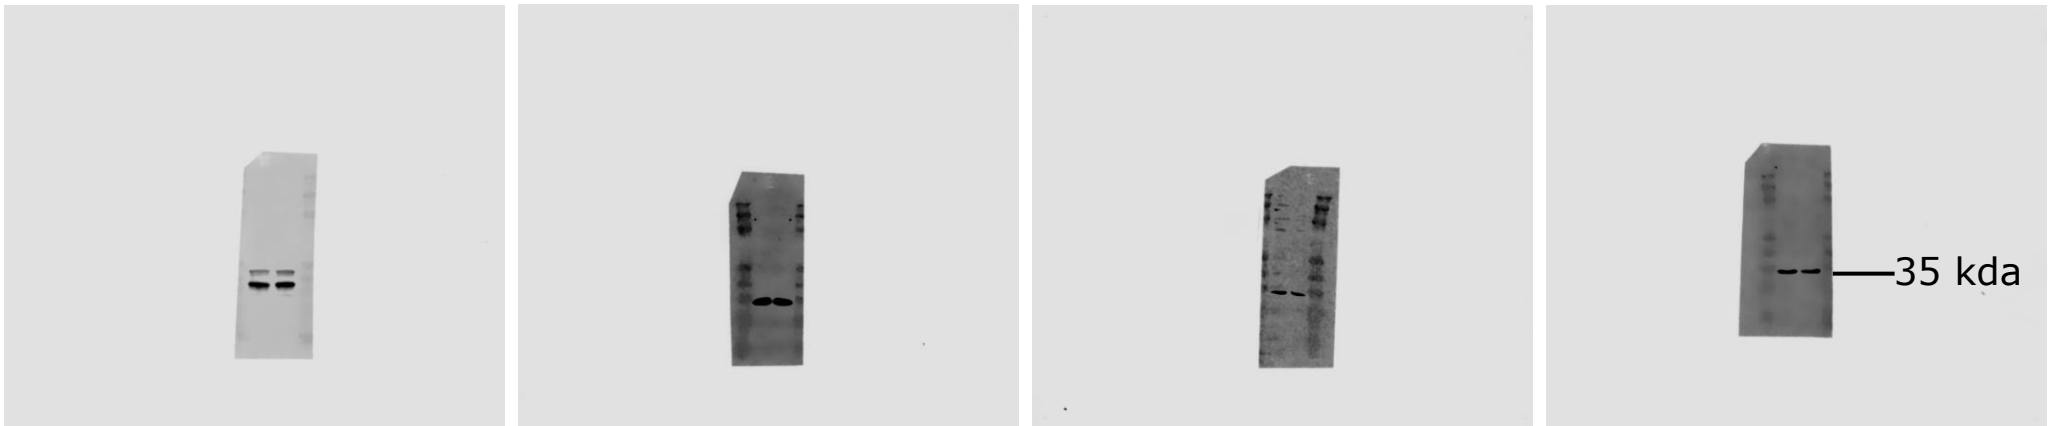

# Figure 2, M

The Image captured by the LICOR instrument processed using Image Studio Ver 5.2.



Uncropped/unedited images ↓

MMP9

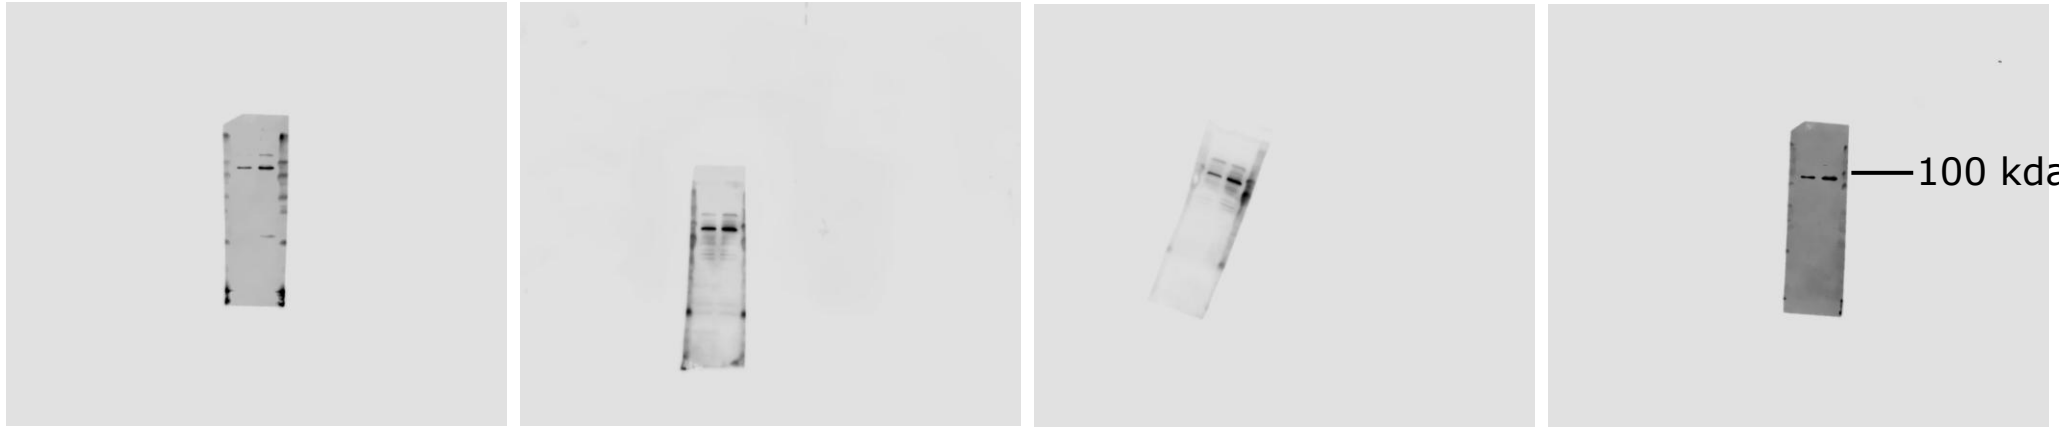

GAPDH

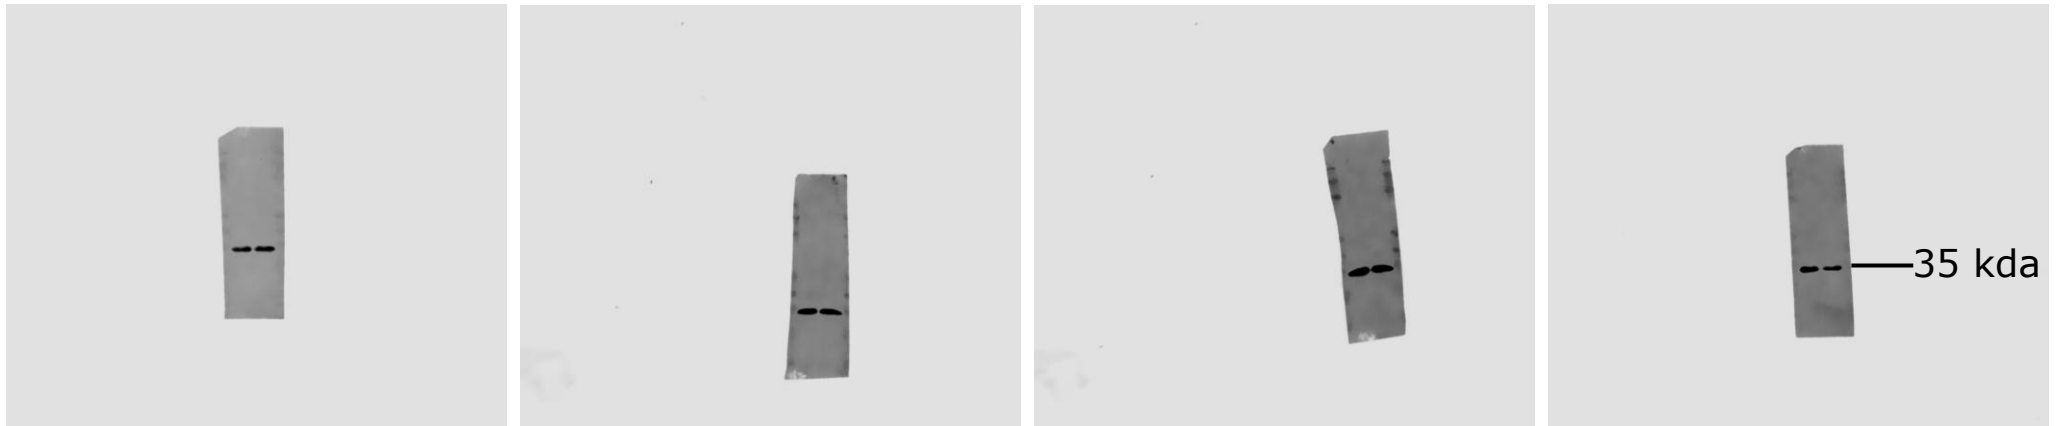

# Figure 2, M

The Image captured by the LICOR instrument processed using Image Studio Ver 5.2.

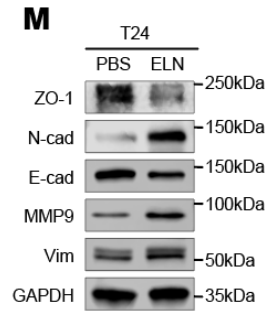

Uncropped/unedited images ↓

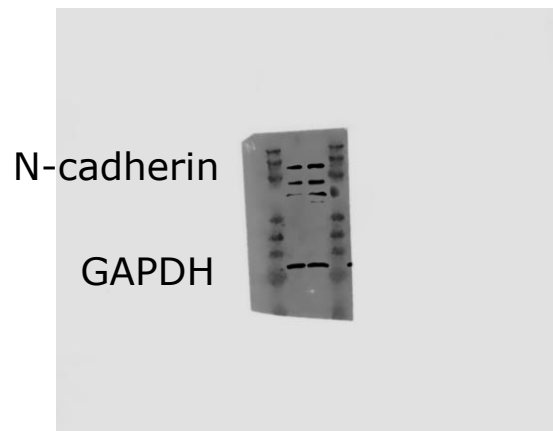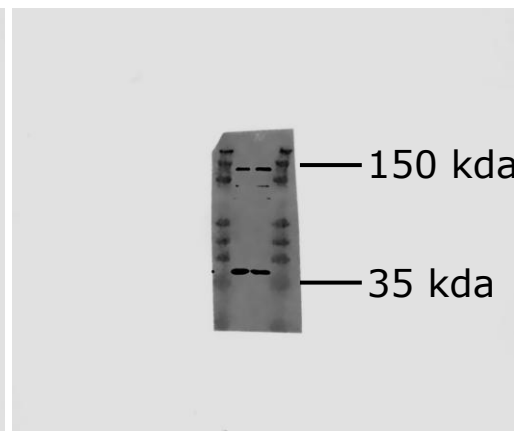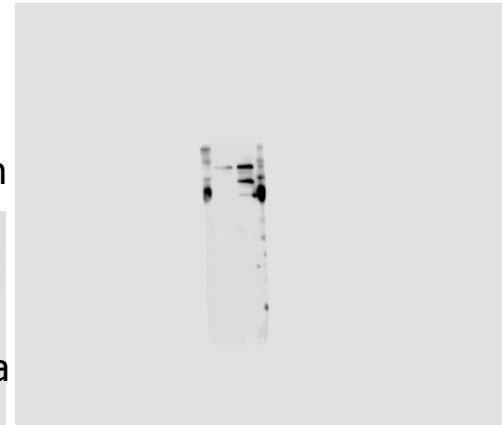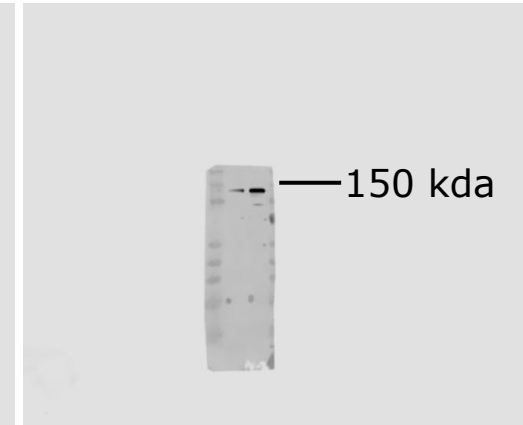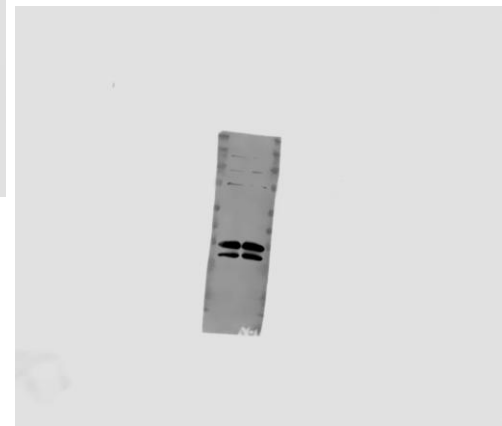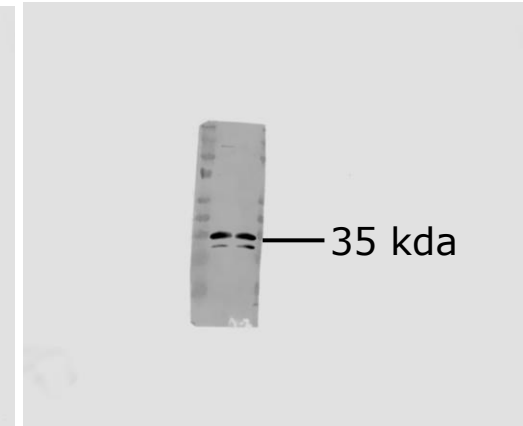

# Figure 2, M

The Image captured by the LICOR instrument processed using Image Studio Ver 5.2.



Uncropped/unedited images ↓

Vim

50 kda

GAPDH

35 kda

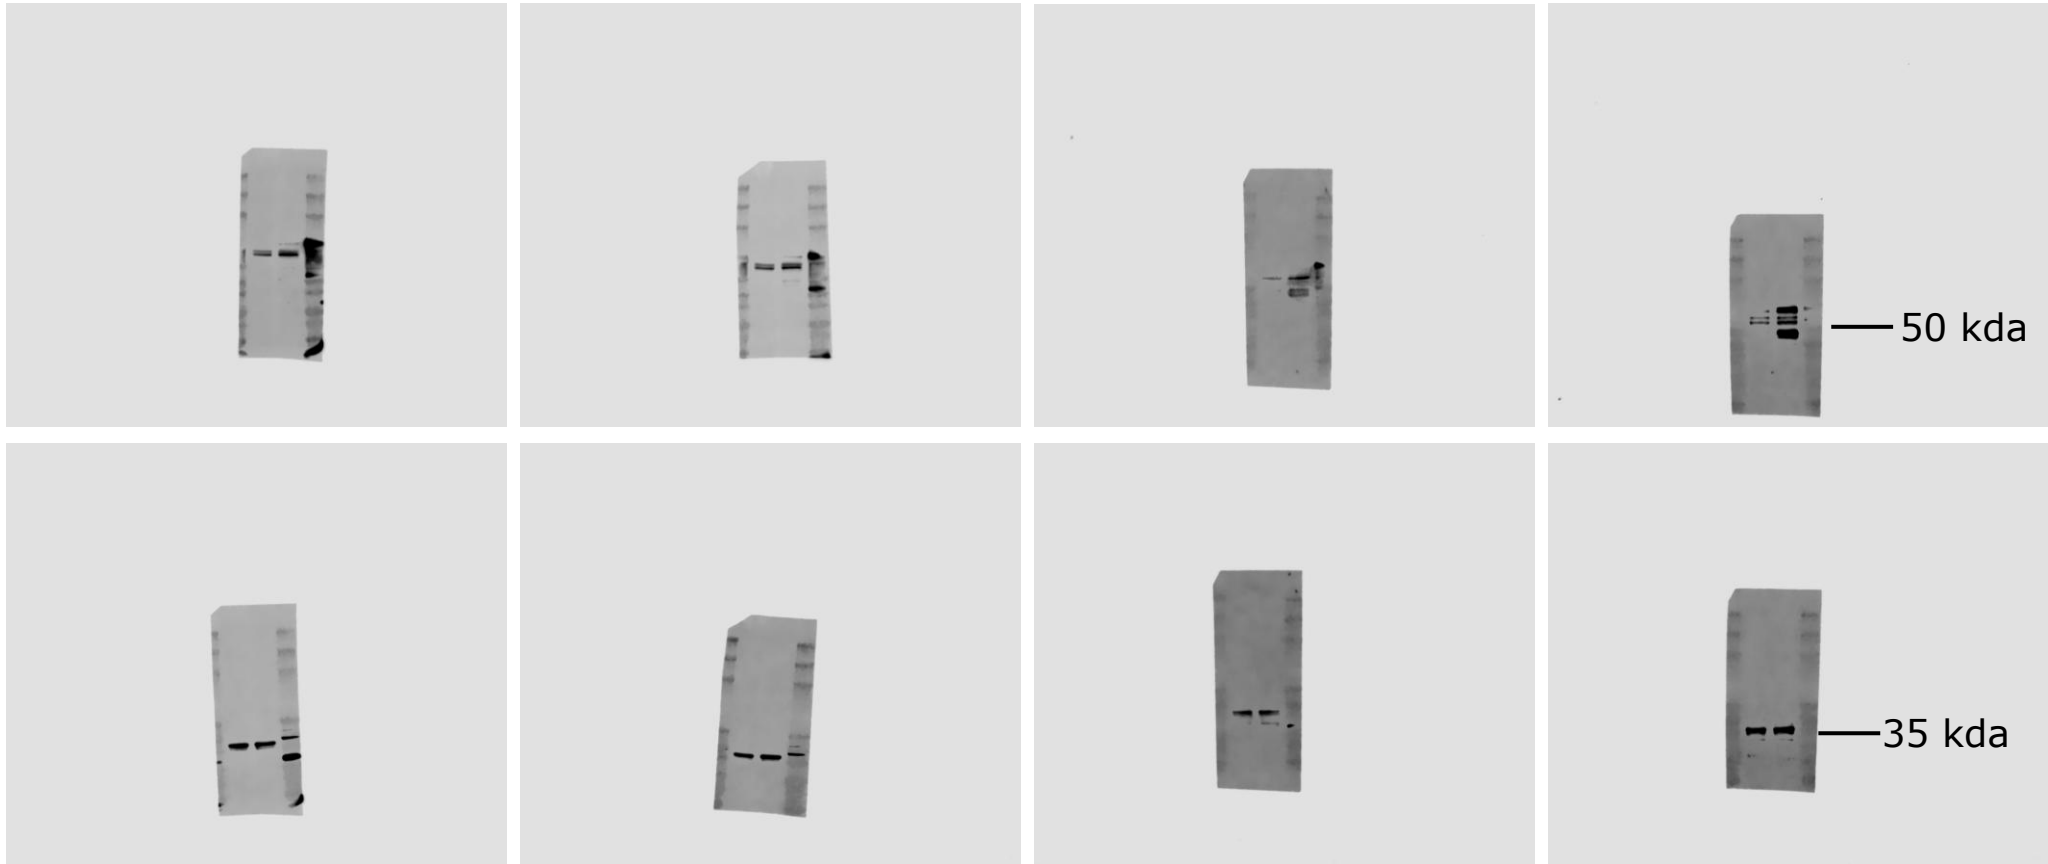

# Figure 2, M

The Image captured by the LICOR instrument processed using Image Studio Ver 5.2.

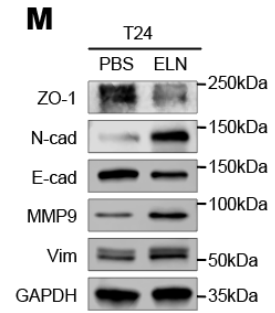

Uncropped/unedited images ↓

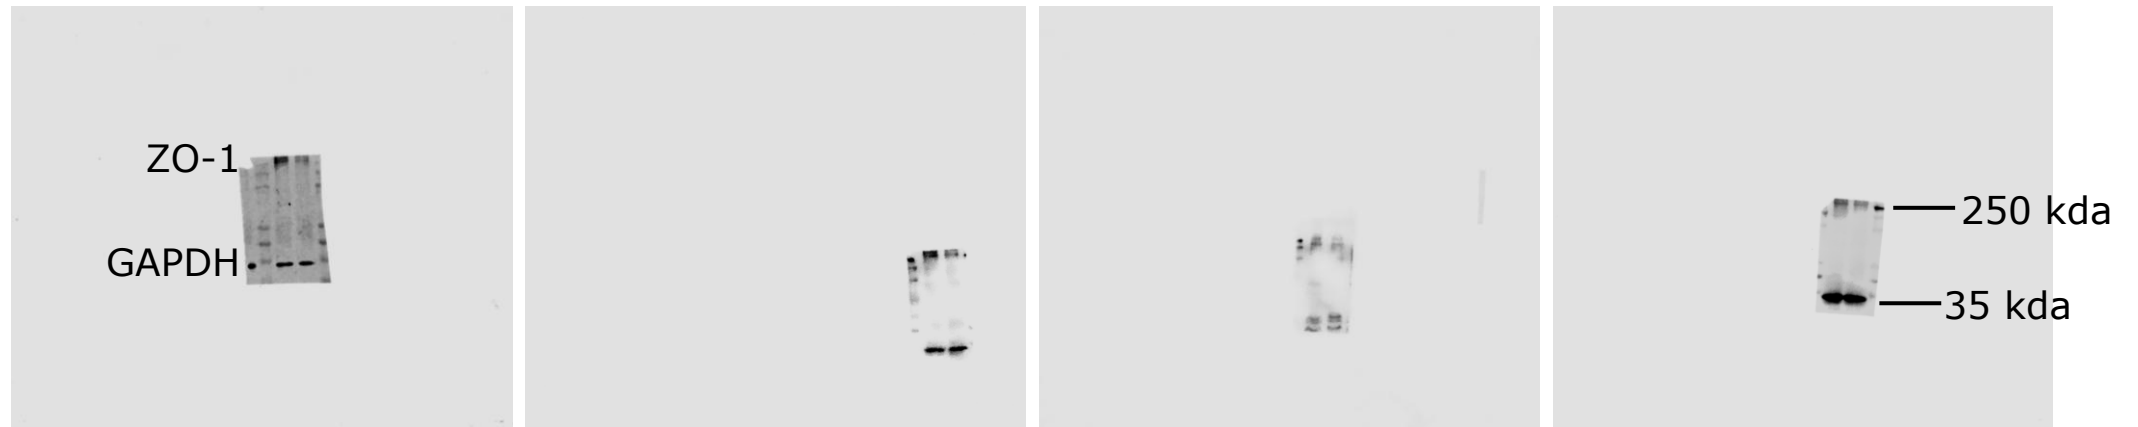

# Figure 5, F

The Image captured by the LICOR instrument processed using Image Studio Ver 5.2.

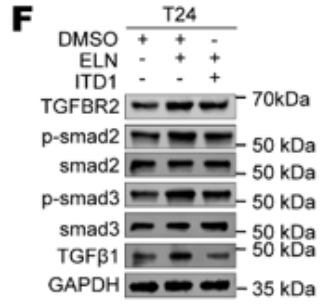

Uncropped/unedited images ↓

TGFBR2

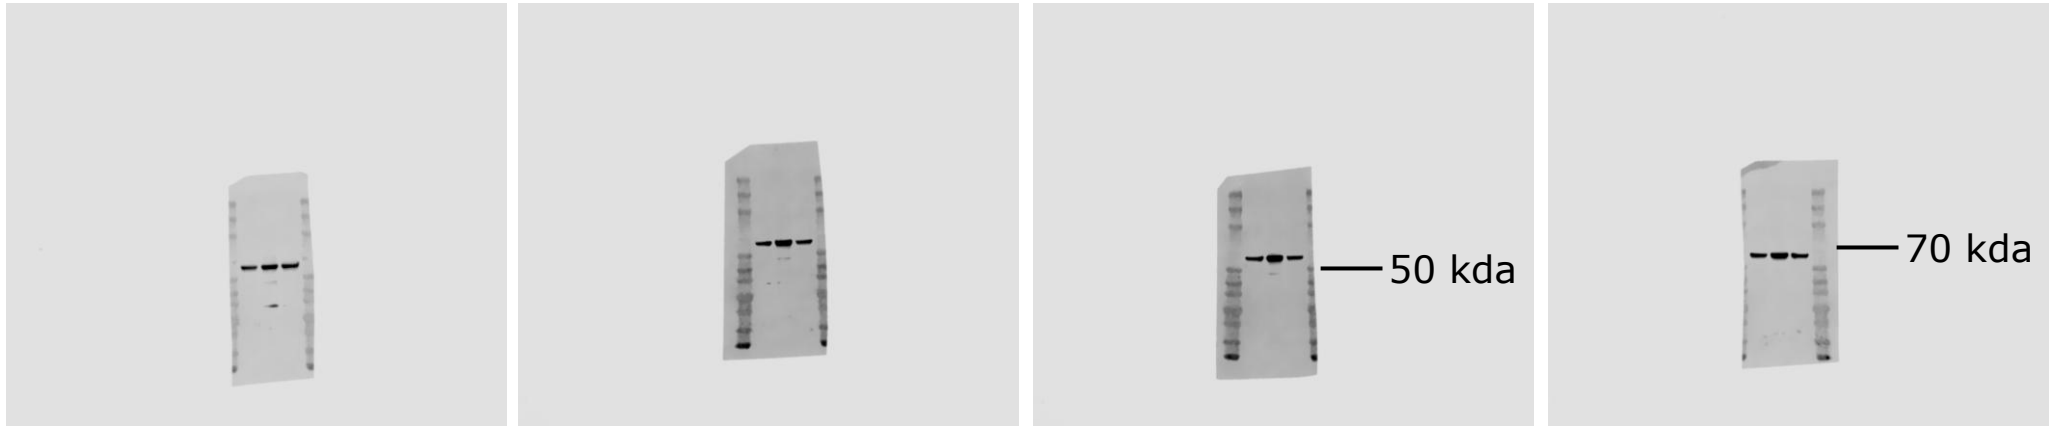

GAPDH

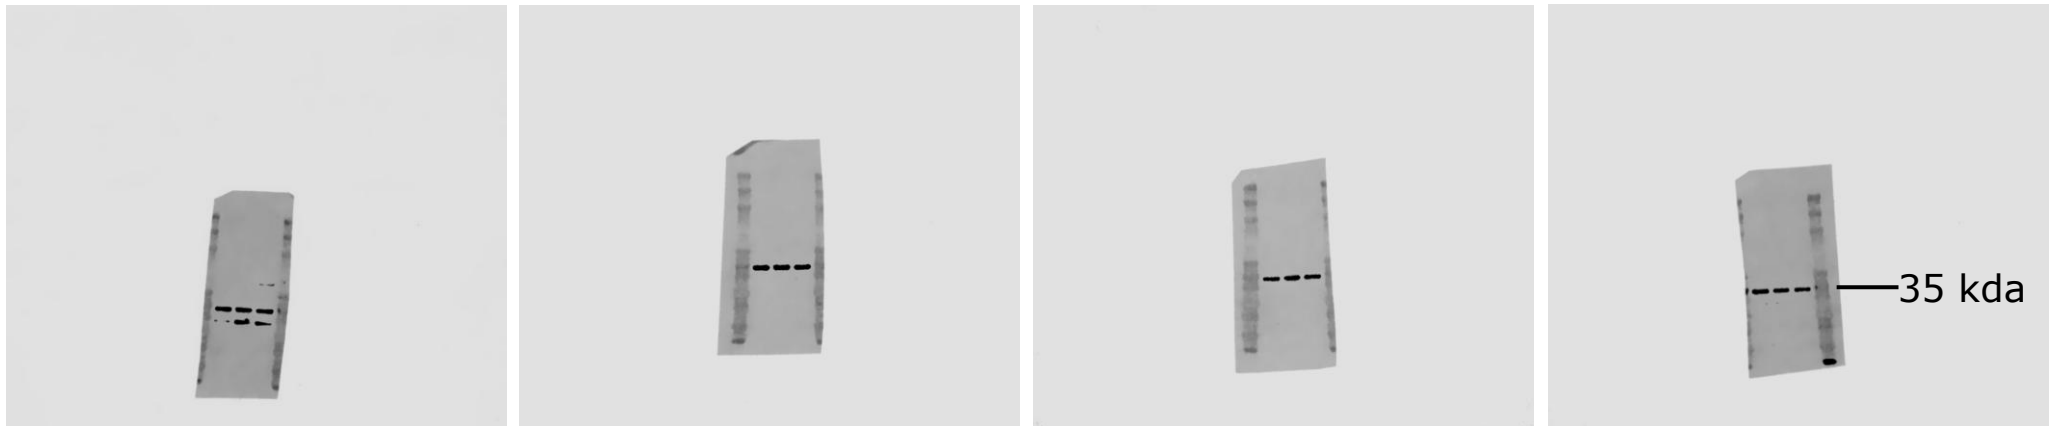

# Figure 5, F

The Image captured by the LICOR instrument processed using Image Studio Ver 5.2.



Uncropped/unedited images ↓

P-smad2

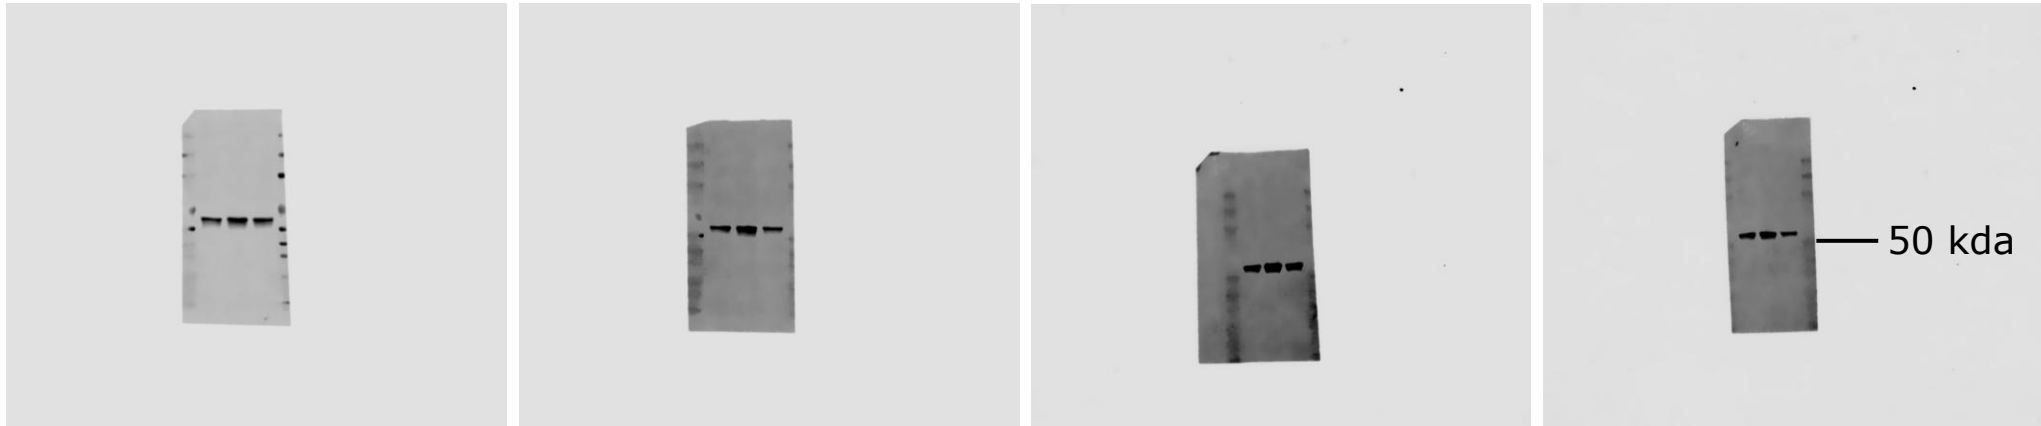

GAPDH

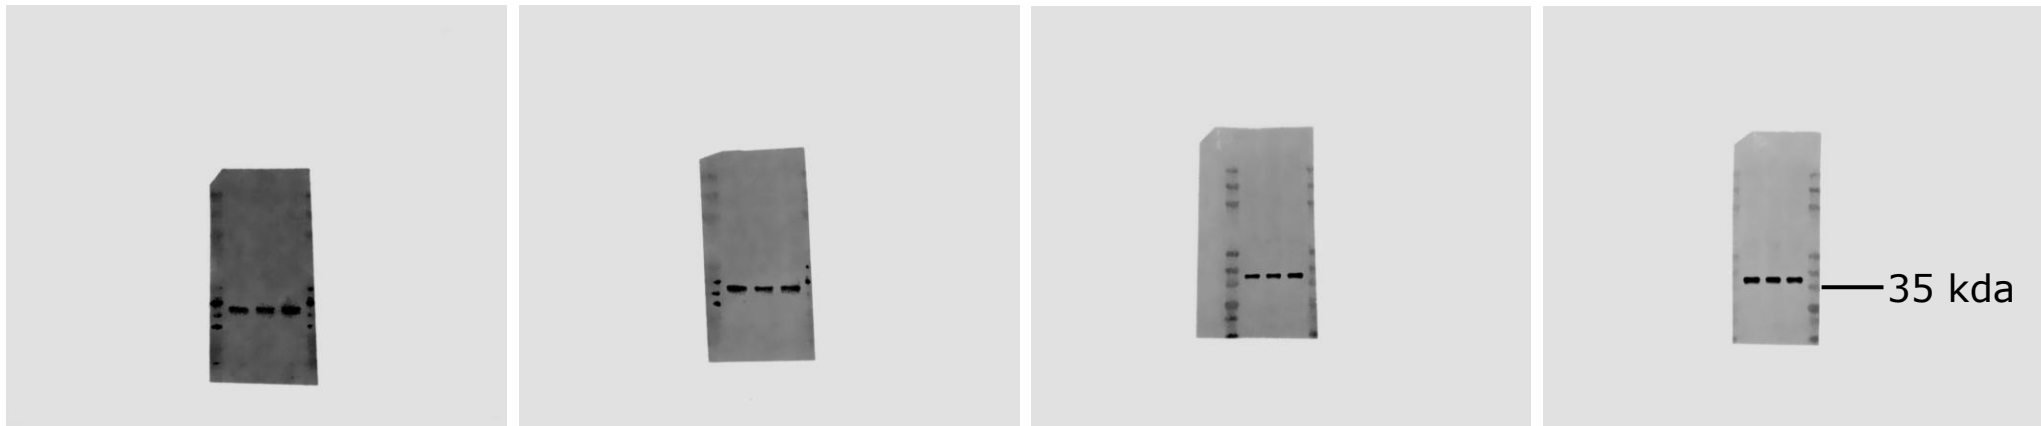

# Figure 5, F

The Image captured by the LICOR instrument processed using Image Studio Ver 5.2.



Uncropped/unedited images ↓

smad2

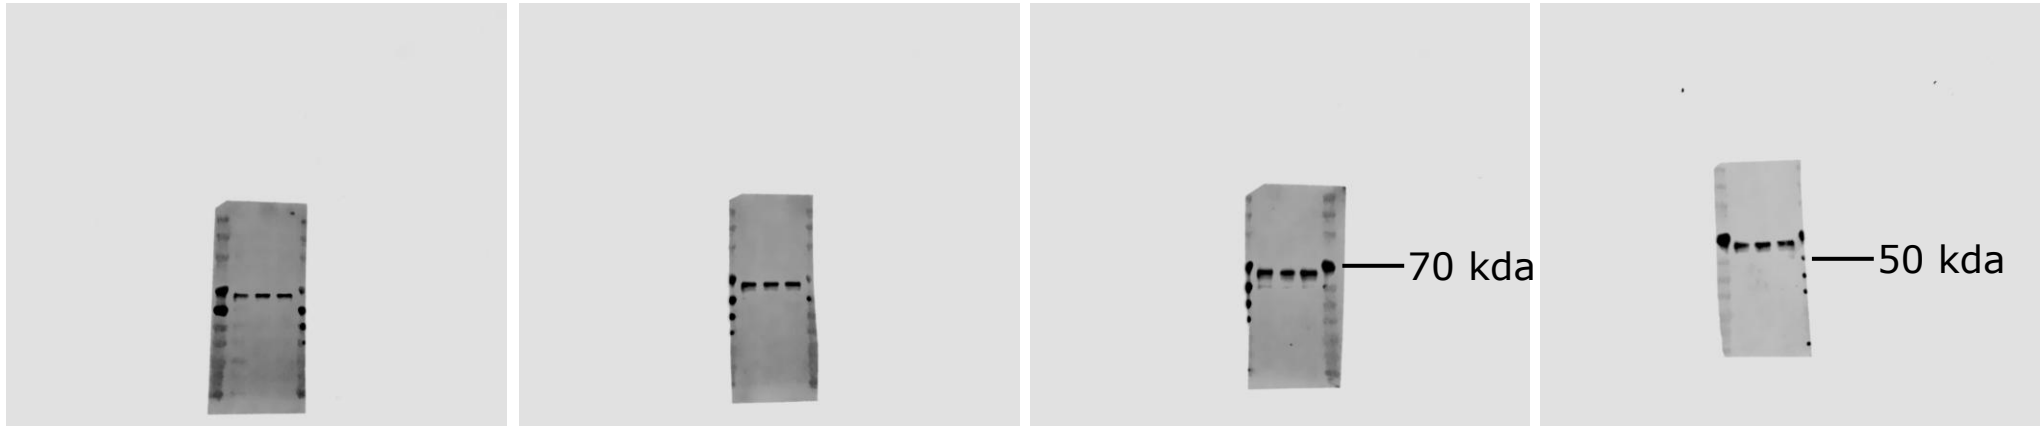

GAPDH

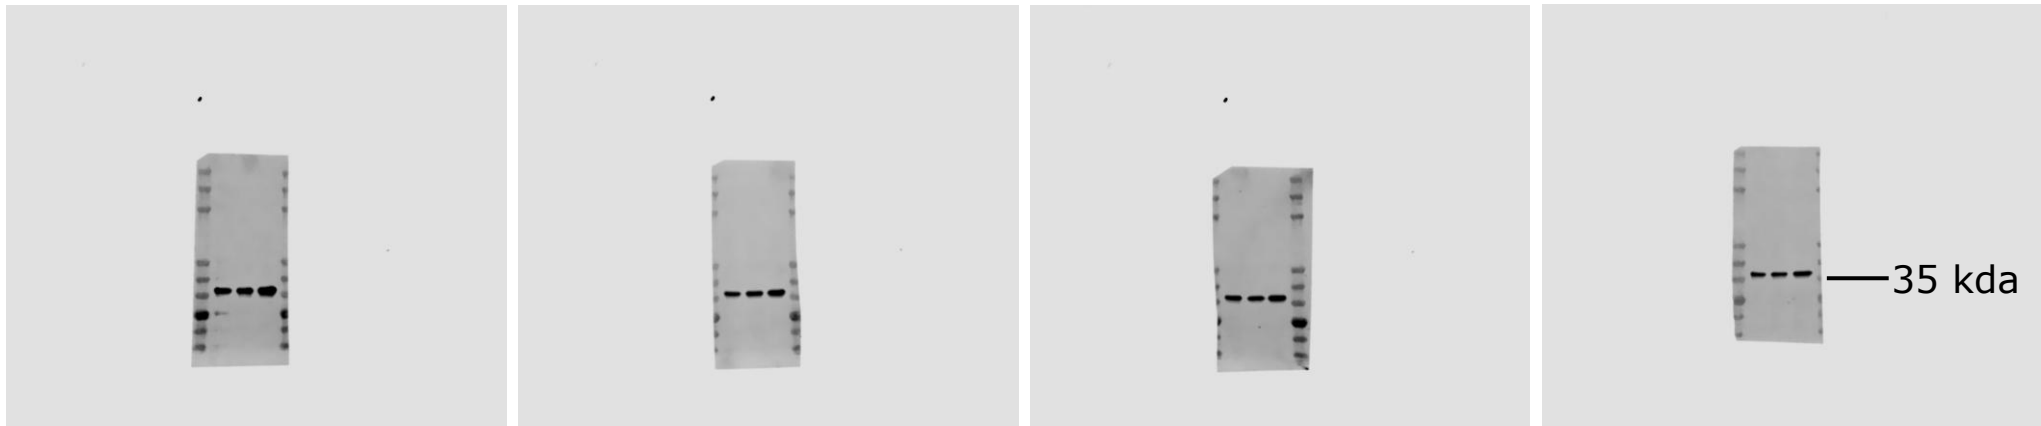

# Figure 5, F

The Image captured by the LICOR instrument processed using Image Studio Ver 5.2.



Uncropped/unedited images↓

P-smad3

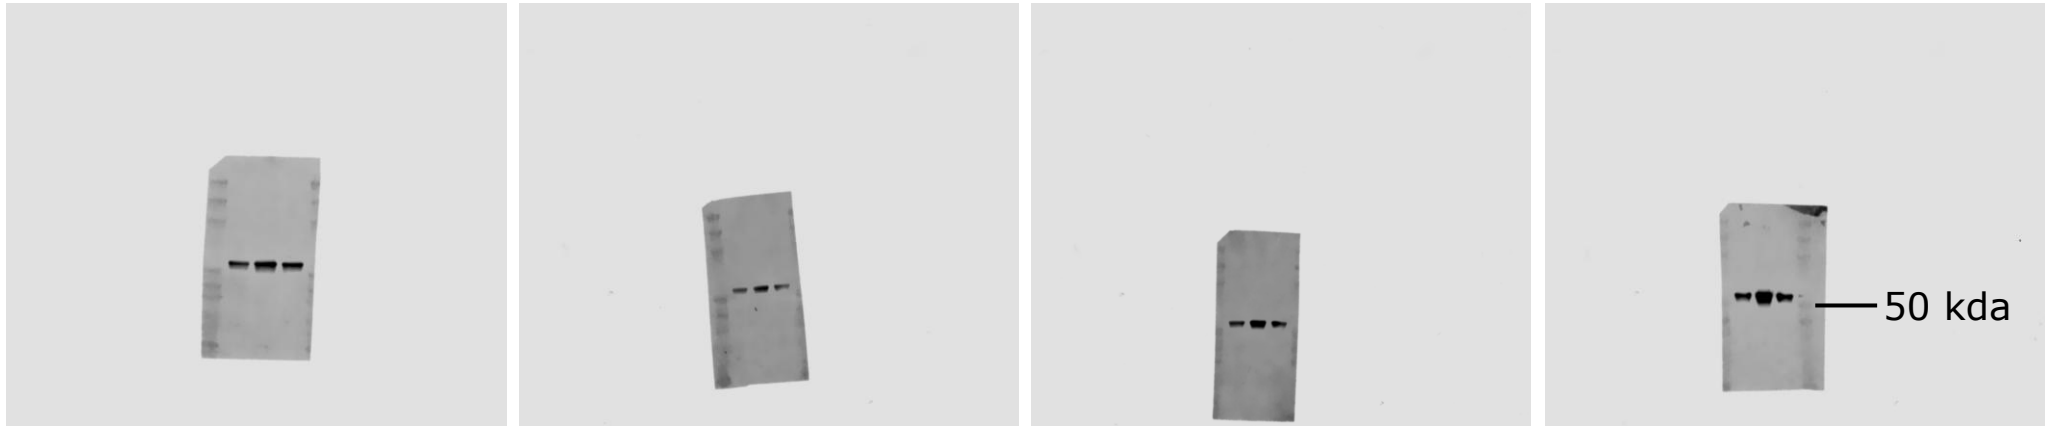

GAPDH

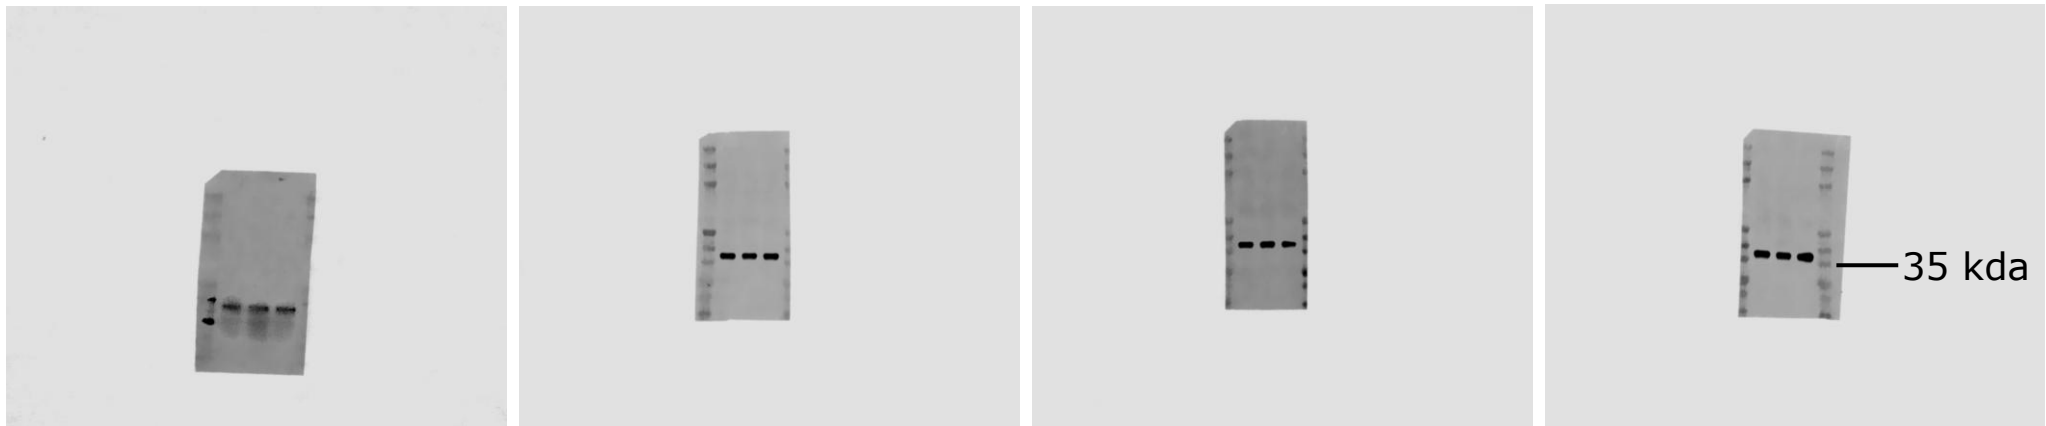

# Figure 5, F

The Image captured by the LICOR instrument processed using Image Studio Ver 5.2.



Uncropped/unedited images ↓

smad3

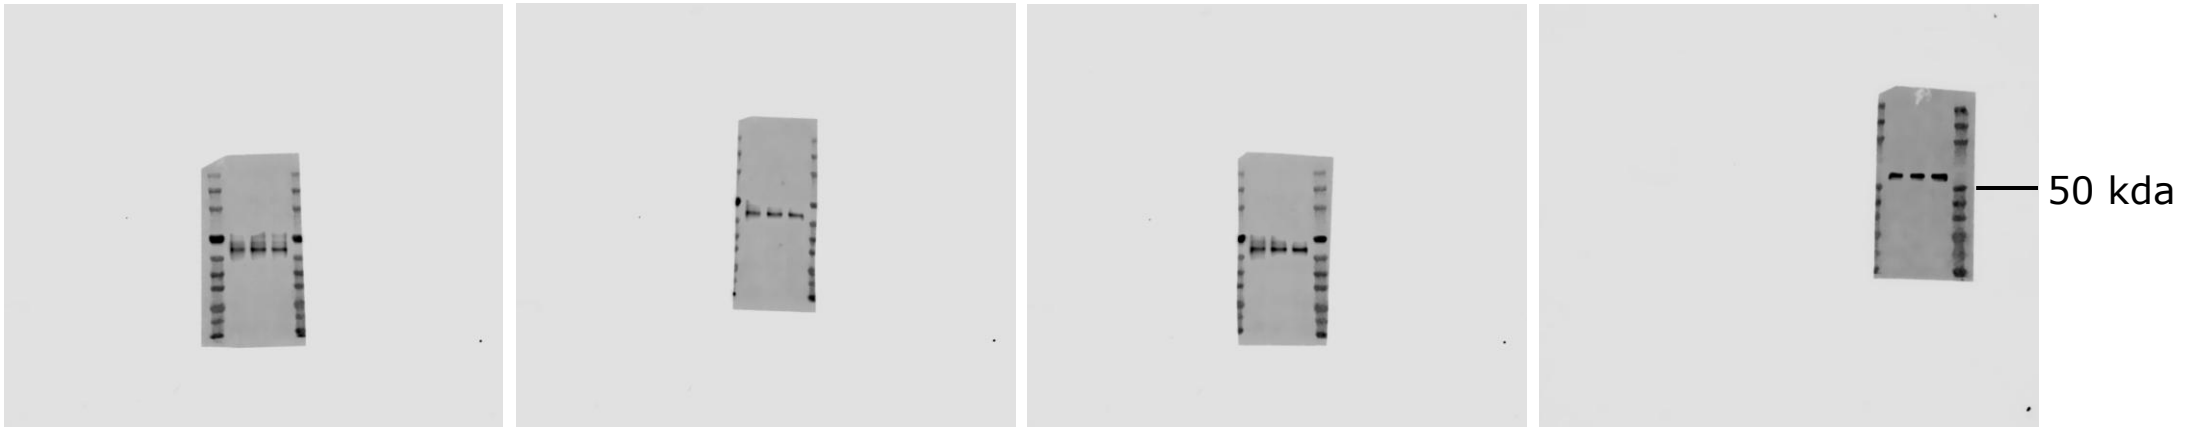

GAPDH

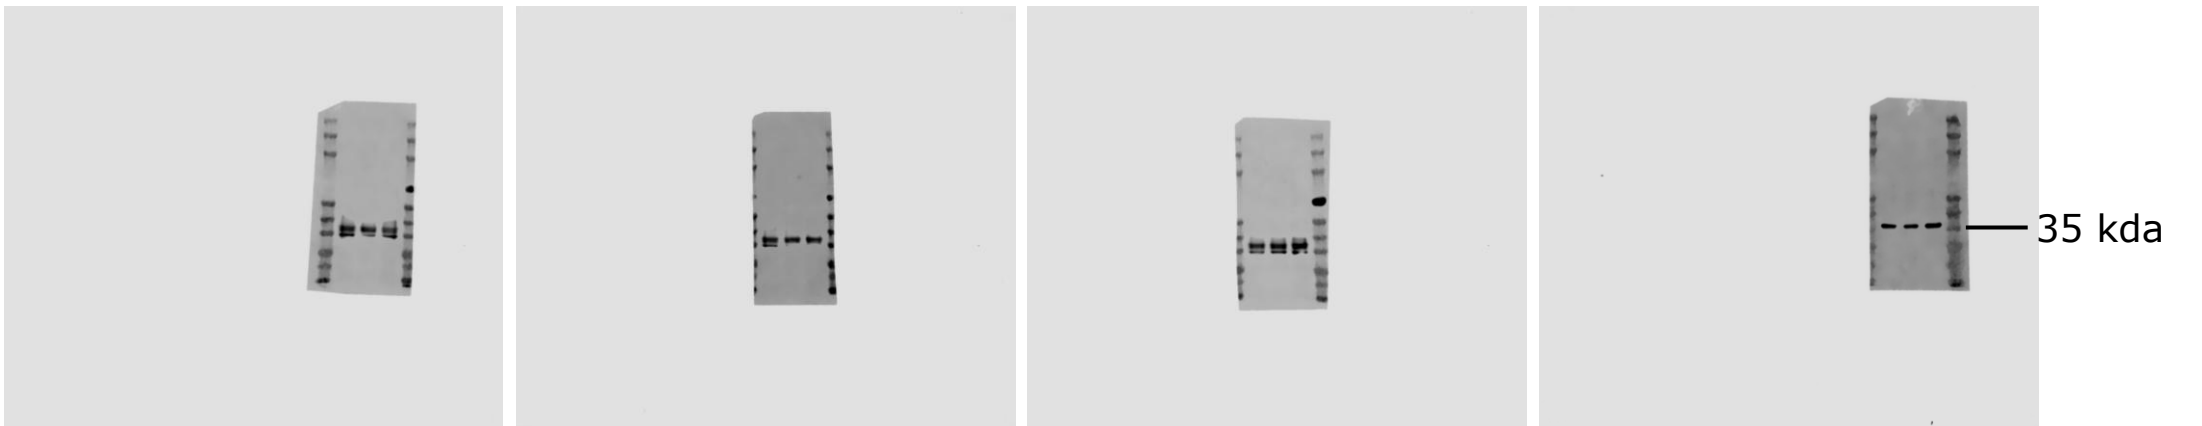

# Figure 5, F

The Image captured by the LICOR instrument processed using Image Studio Ver 5.2.



Uncropped/unedited images↓

TGFβ1

50 kda

50 kda

GAPDH

35 kda

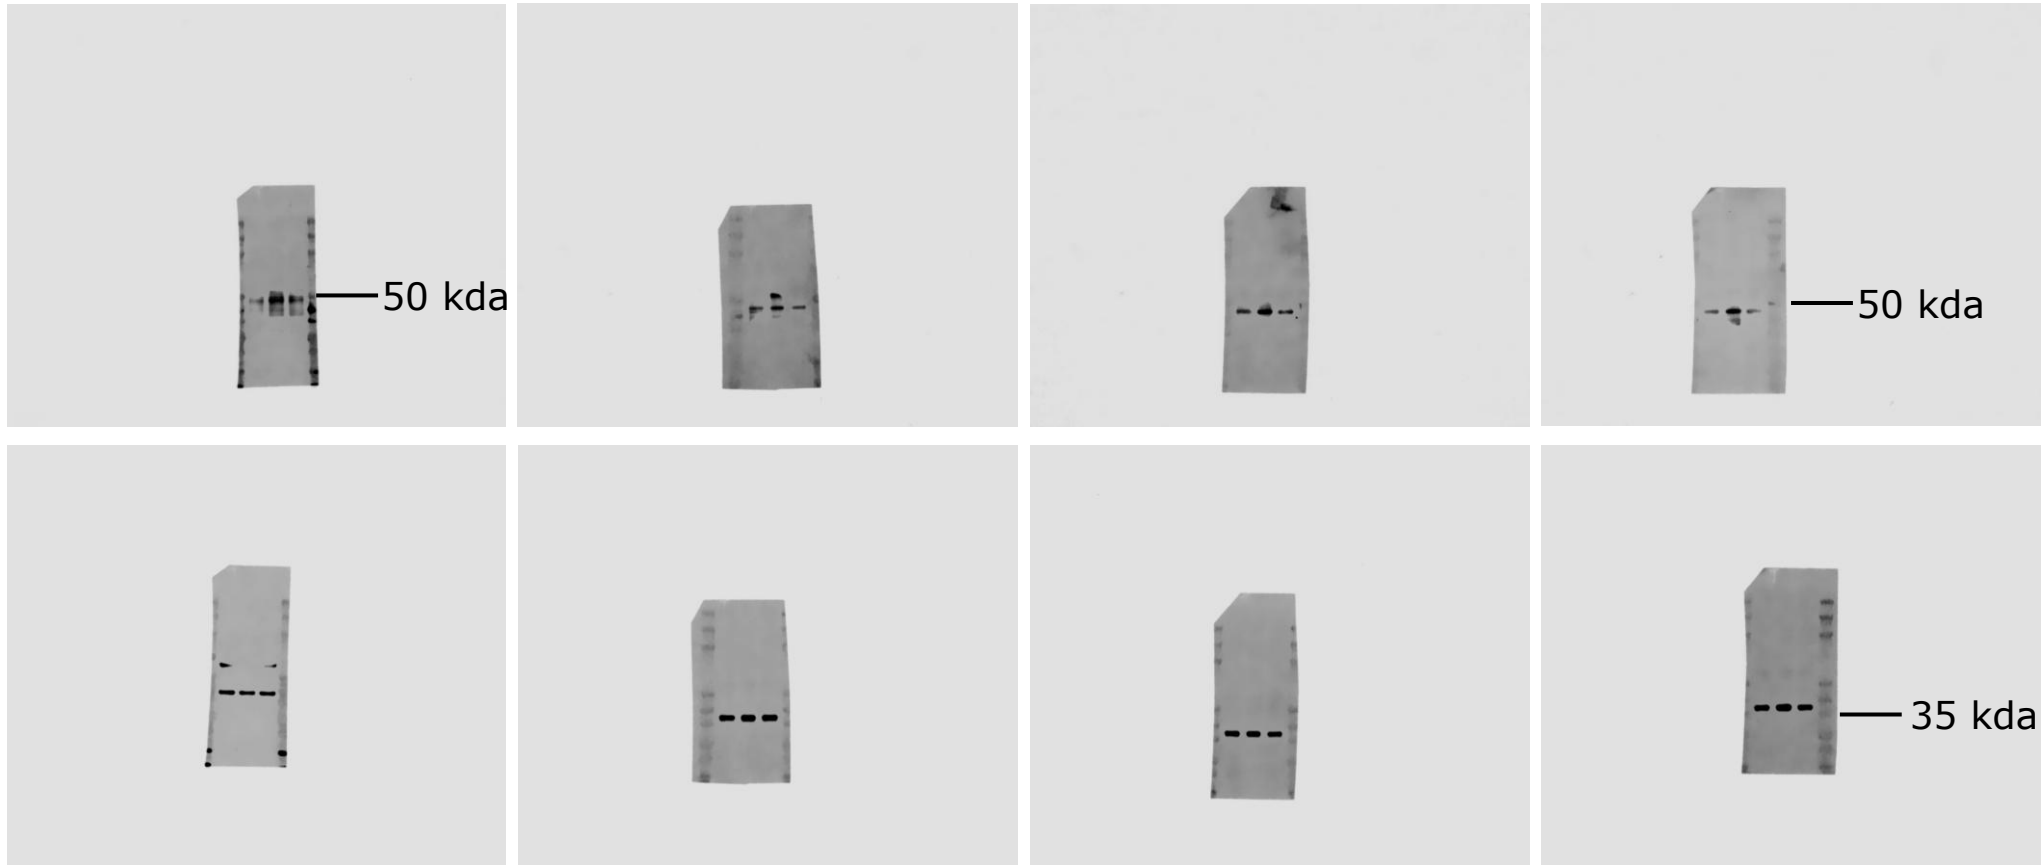

# Figure 5, J

The Image captured by the LICOR instrument processed using Image Studio Ver 5.2.

Uncropped/unedited images↓

|      | T cell |   |   |
|------|--------|---|---|
| DMSO | +      | + | - |
| ELN  | -      | + | + |
| ITD1 | -      | - | + |

  

|         |  |  |  |        |
|---------|--|--|--|--------|
| TGFBR2  |  |  |  | 70kDa  |
| p-smad2 |  |  |  | 50 kDa |
| smad2   |  |  |  | 50 kDa |
| p-smad3 |  |  |  | 50 kDa |
| smad3   |  |  |  | 50 kDa |
| TGFβ1   |  |  |  | 50 kDa |
| GAPDH   |  |  |  | 35 kDa |

TGFBR2

70 kda

GAPDH

35 kda

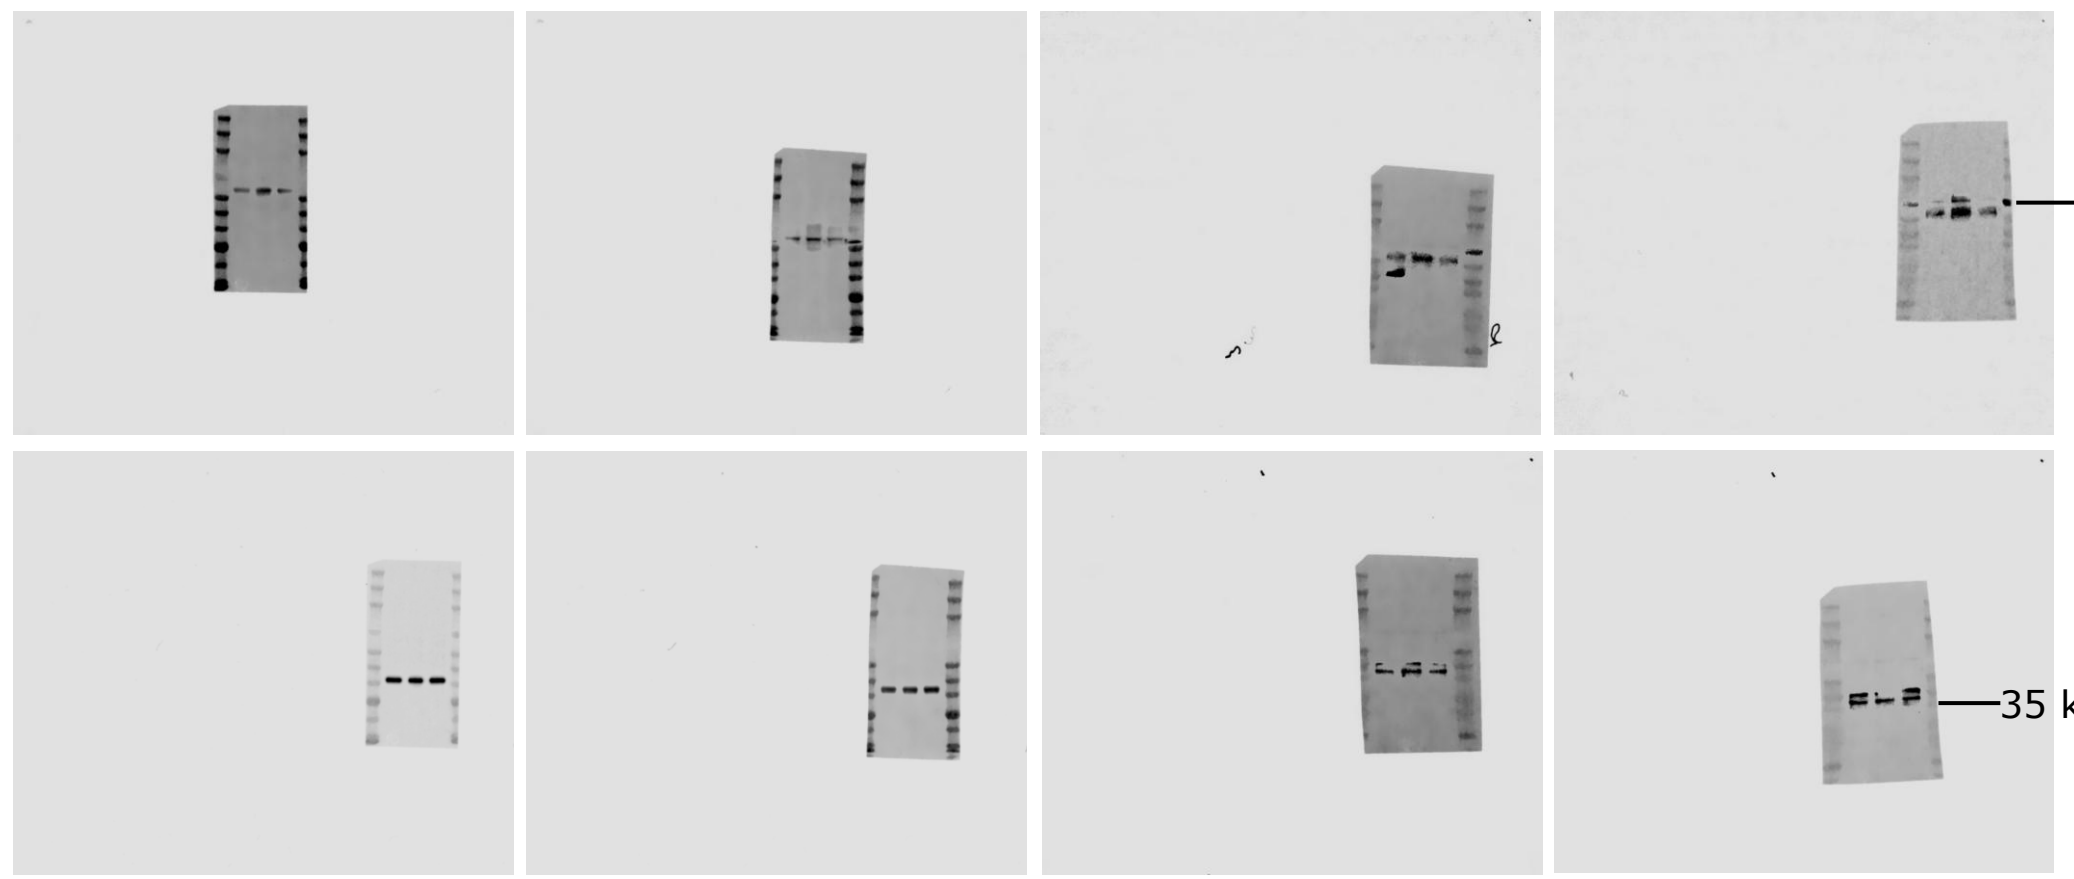

**Figure 5, J**

The Image captured by the LICOR instrument processed using Image Studio Ver 5.2.

Uncropped/unedited images↓

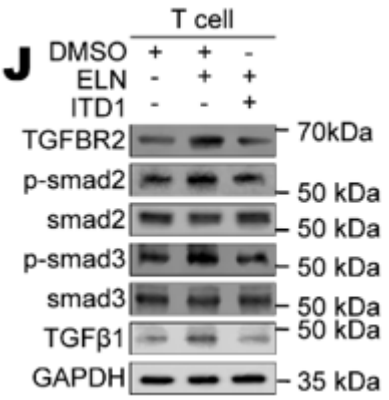

P-smad2

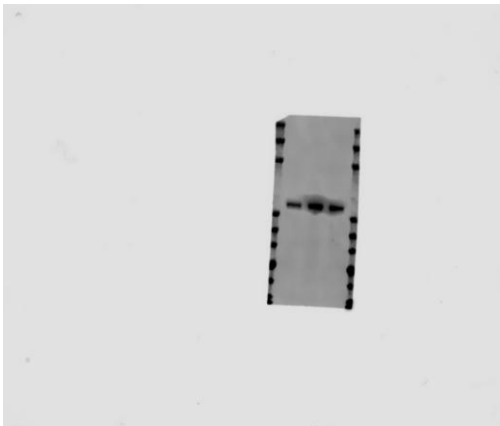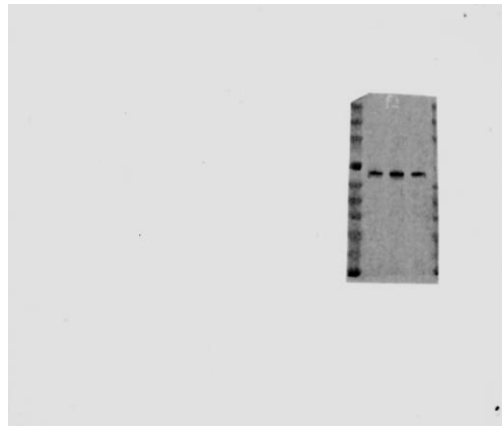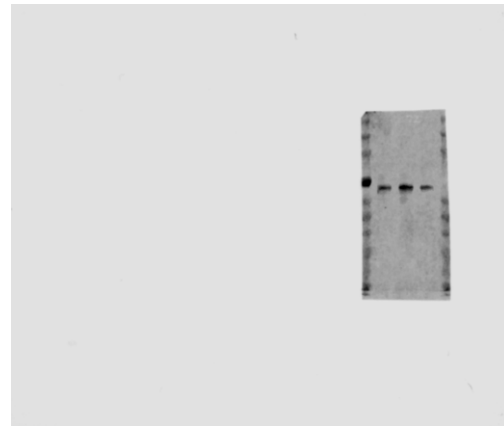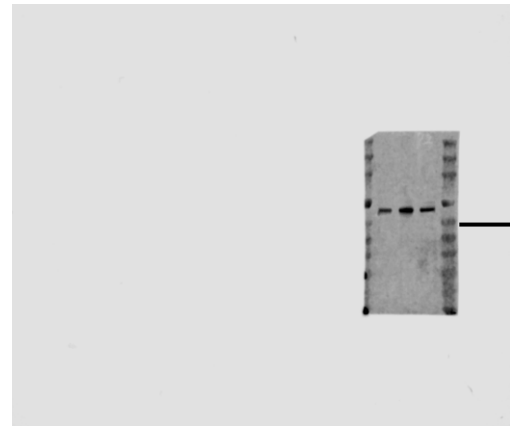

GAPDH

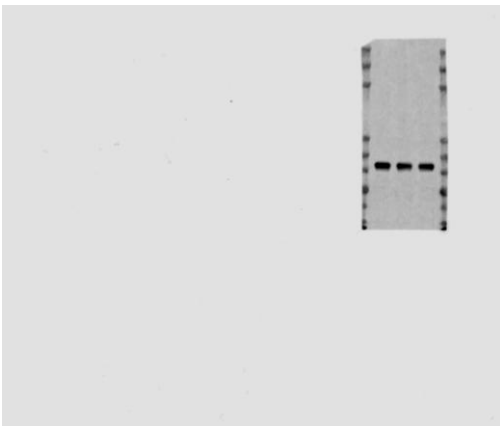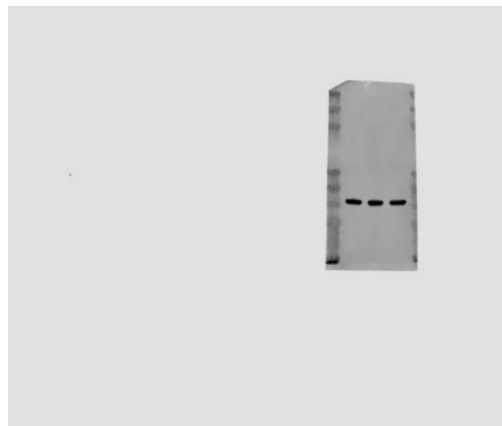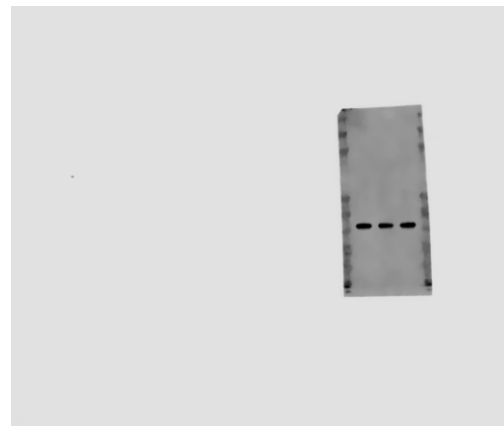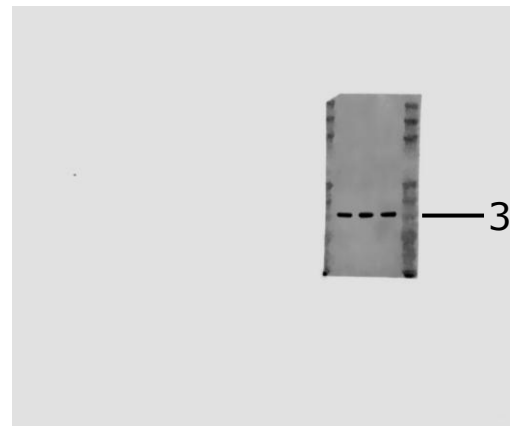

**Figure 5, J**

The Image captured by the LICOR instrument processed using Image Studio Ver 5.2.

Uncropped/unedited images↓



smad2

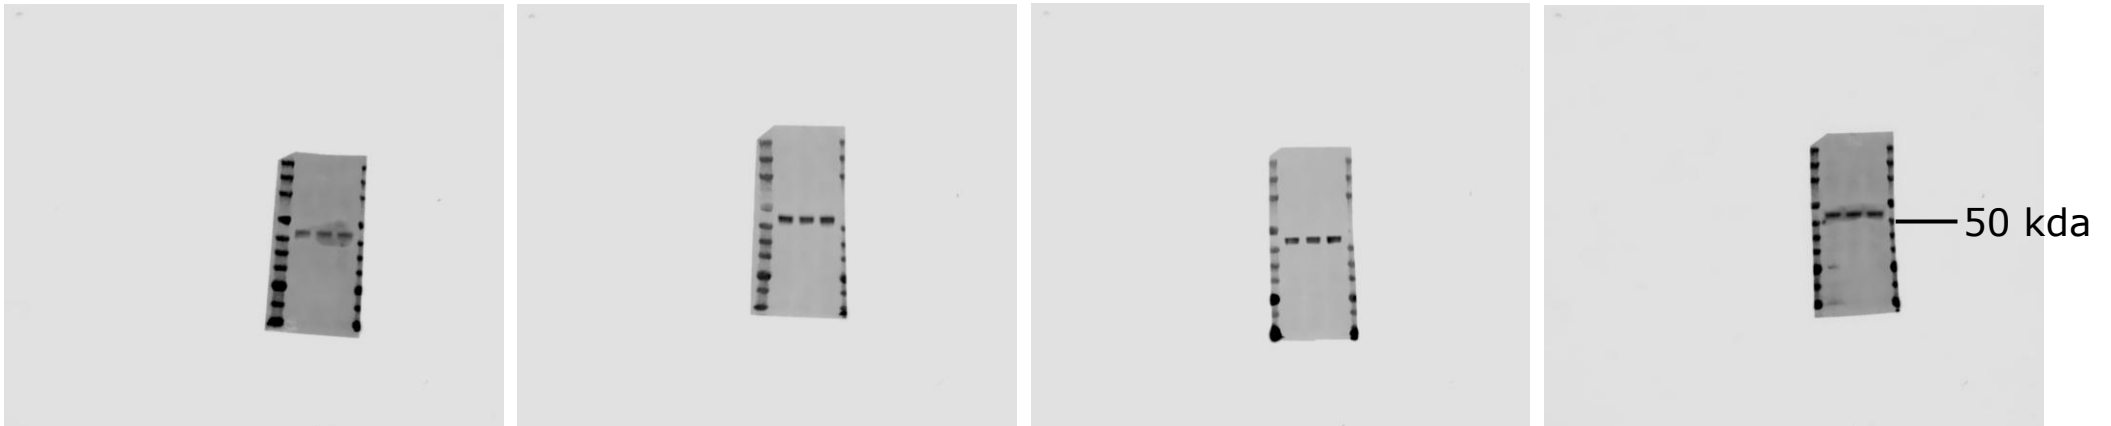

GAPDH

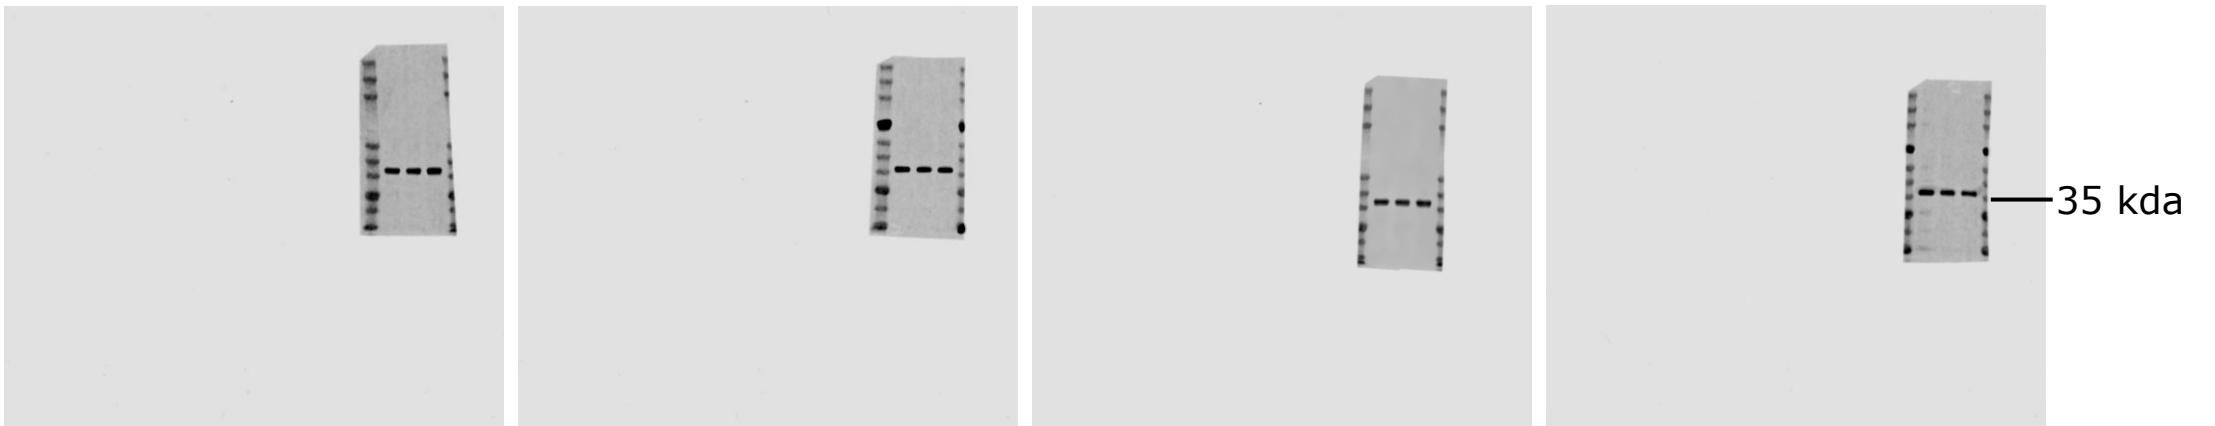

# Figure 5, J

The Image captured by the LICOR instrument processed using Image Studio Ver 5.2.

Uncropped/unedited images ↓

|         | T cell |   |   |        |
|---------|--------|---|---|--------|
| DMSO    | +      | + | - |        |
| ELN     | -      | + | + |        |
| ITD1    | -      | - | + |        |
| TGFBR2  |        |   |   | 70kDa  |
| p-smad2 |        |   |   | 50 kDa |
| smad2   |        |   |   | 50 kDa |
| p-smad3 |        |   |   | 50 kDa |
| smad3   |        |   |   | 50 kDa |
| TGFβ1   |        |   |   | 50 kDa |
| GAPDH   |        |   |   | 35 kDa |

P-smad3

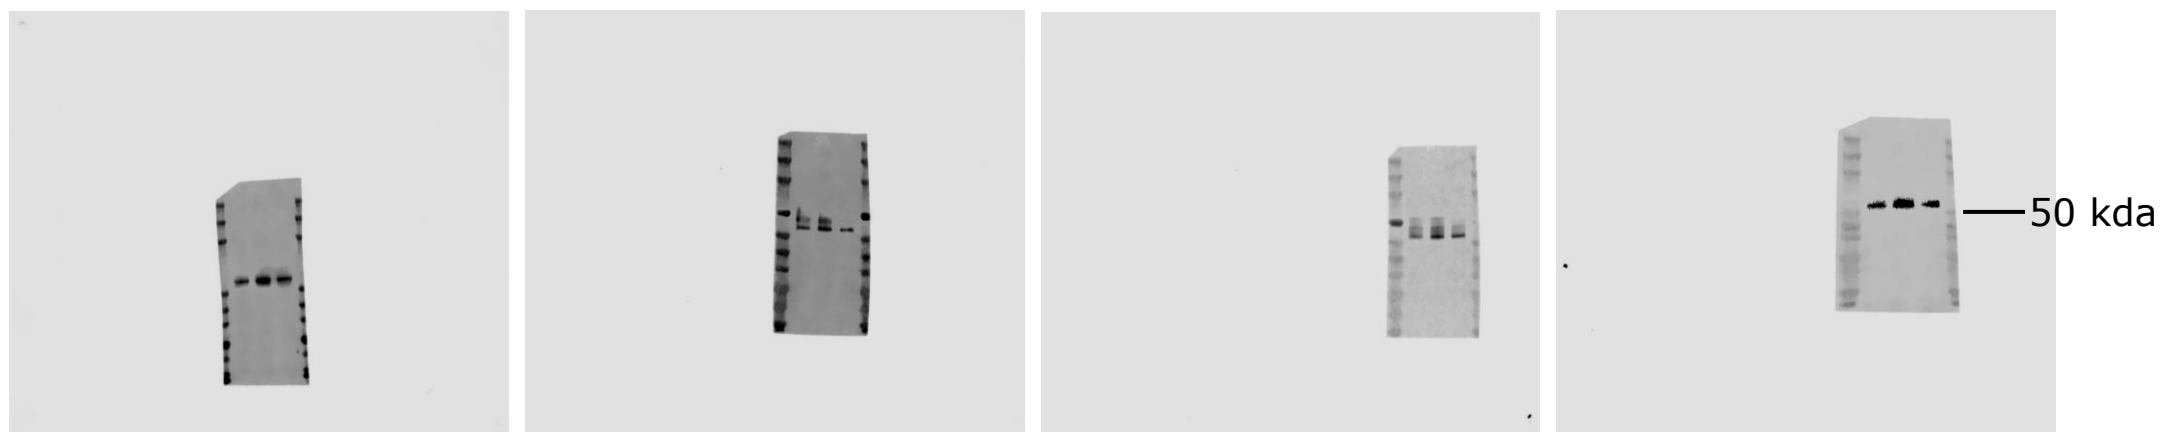

GAPDH

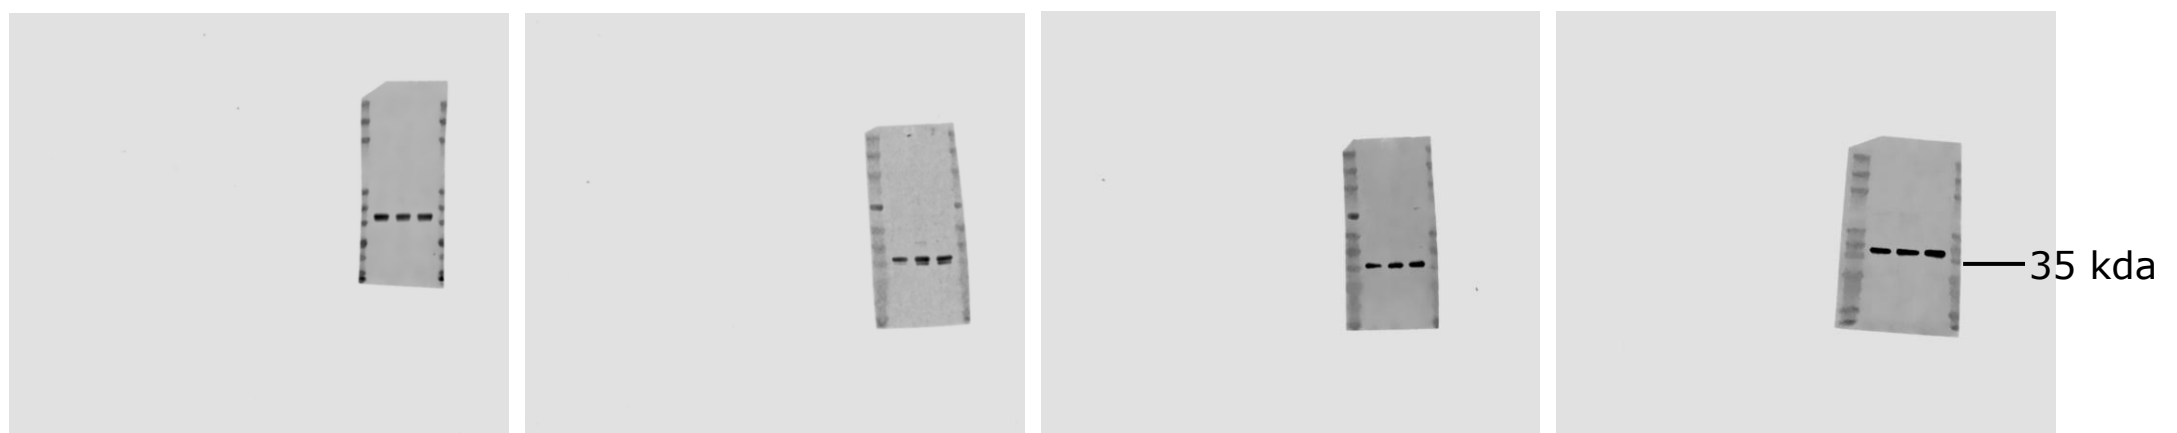

**Figure 5, J**

The Image captured by the LICOR instrument processed using Image Studio Ver 5.2.

Uncropped/unedited images↓



smad3

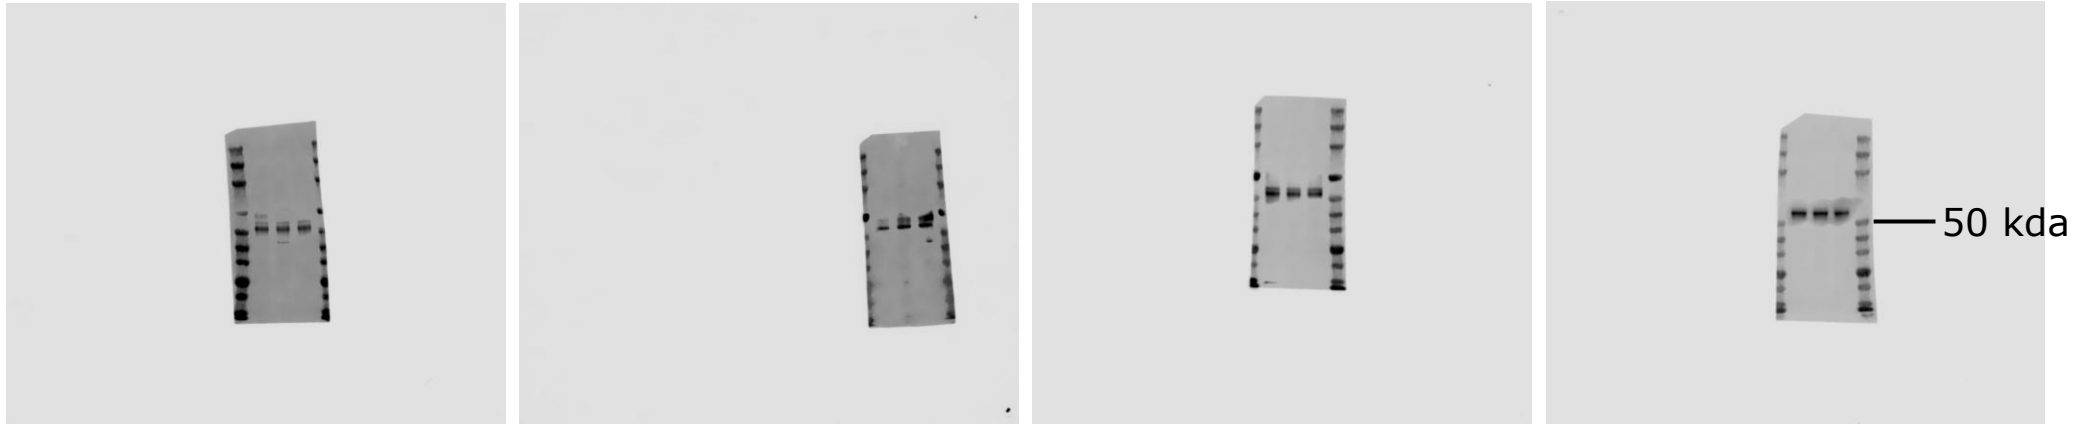

GAPDH

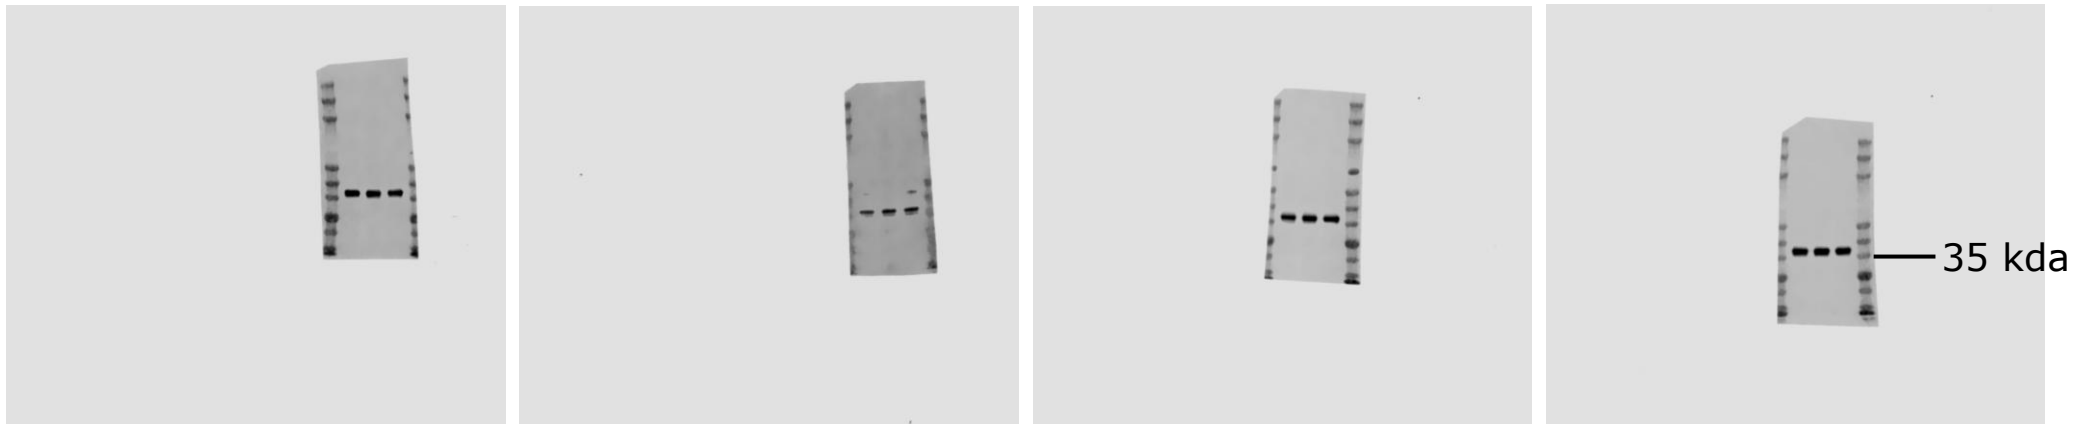

**Figure 5, J**

The Image captured by the LICOR instrument processed using Image Studio Ver 5.2.

Uncropped/unedited images↓

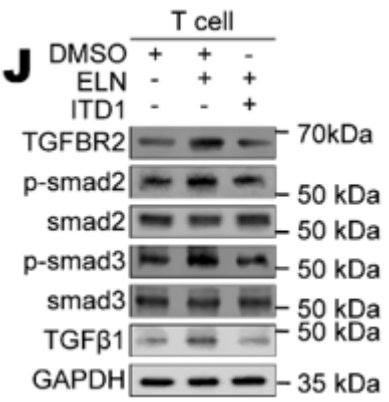

TGFβ1

50 kda

GAPDH

35 kda

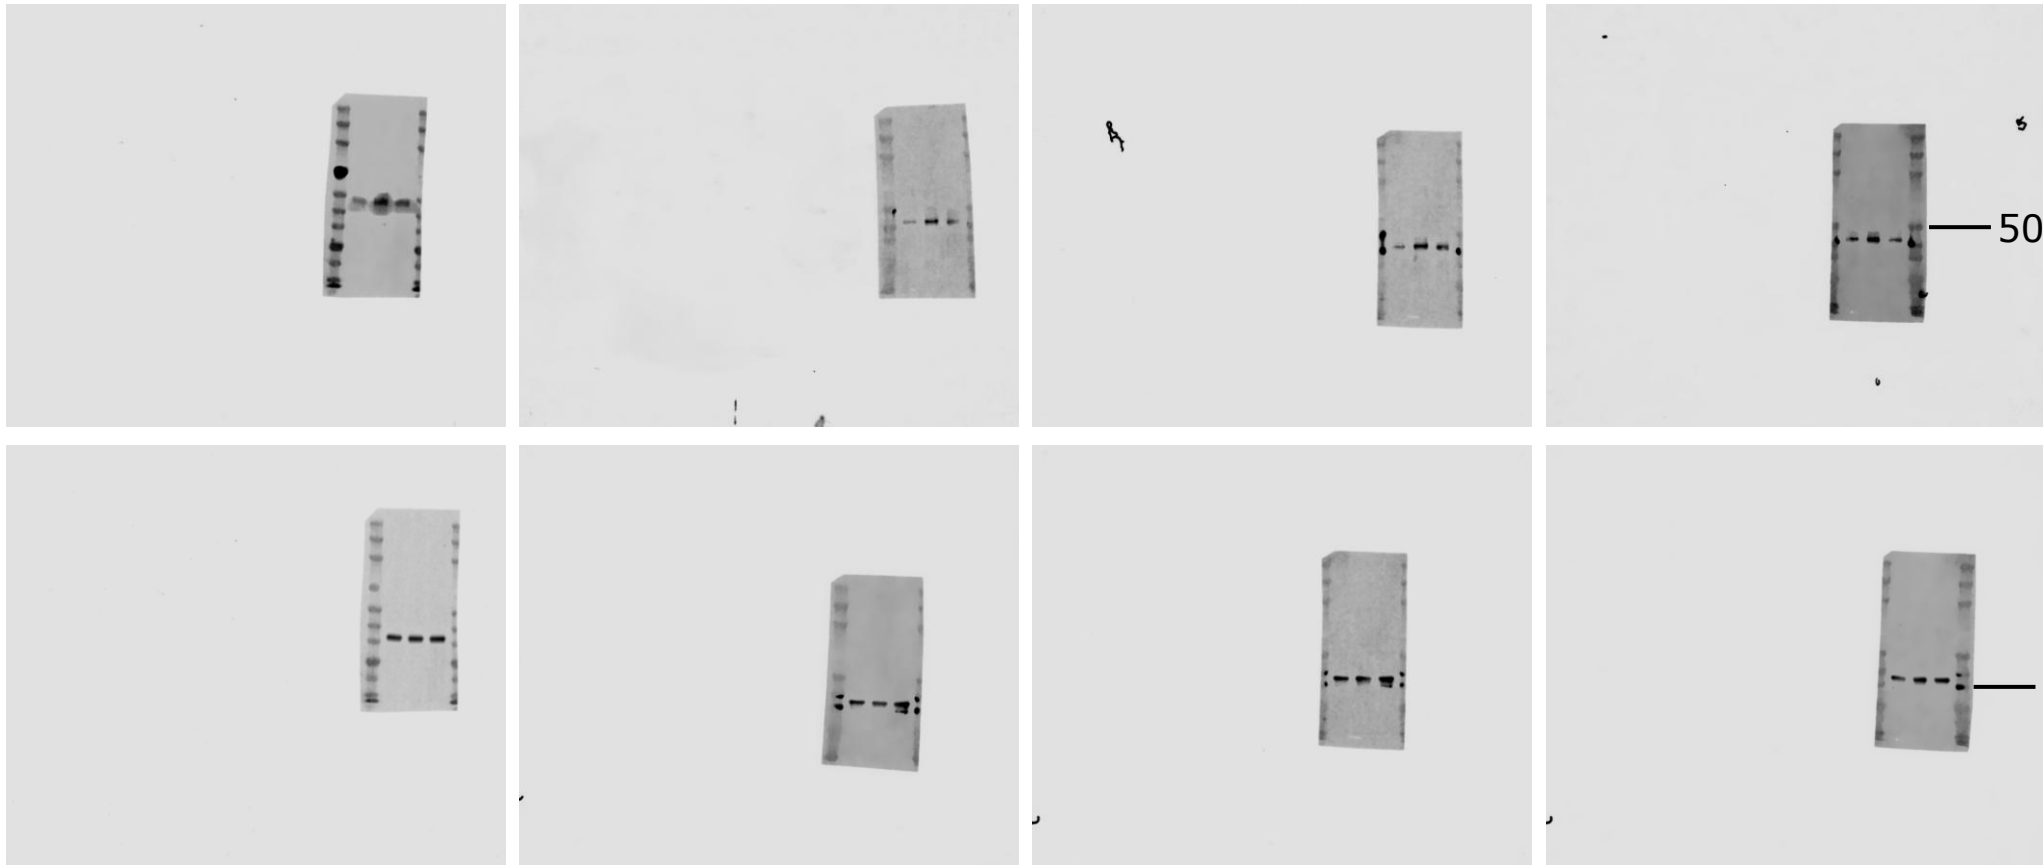

**Figure 5, K**

The Image captured by the LICOR instrument processed using Image Studio Ver 5.2.

Uncropped/unedited images↓

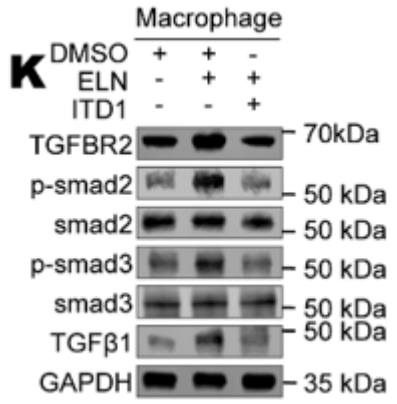

TGFBR2

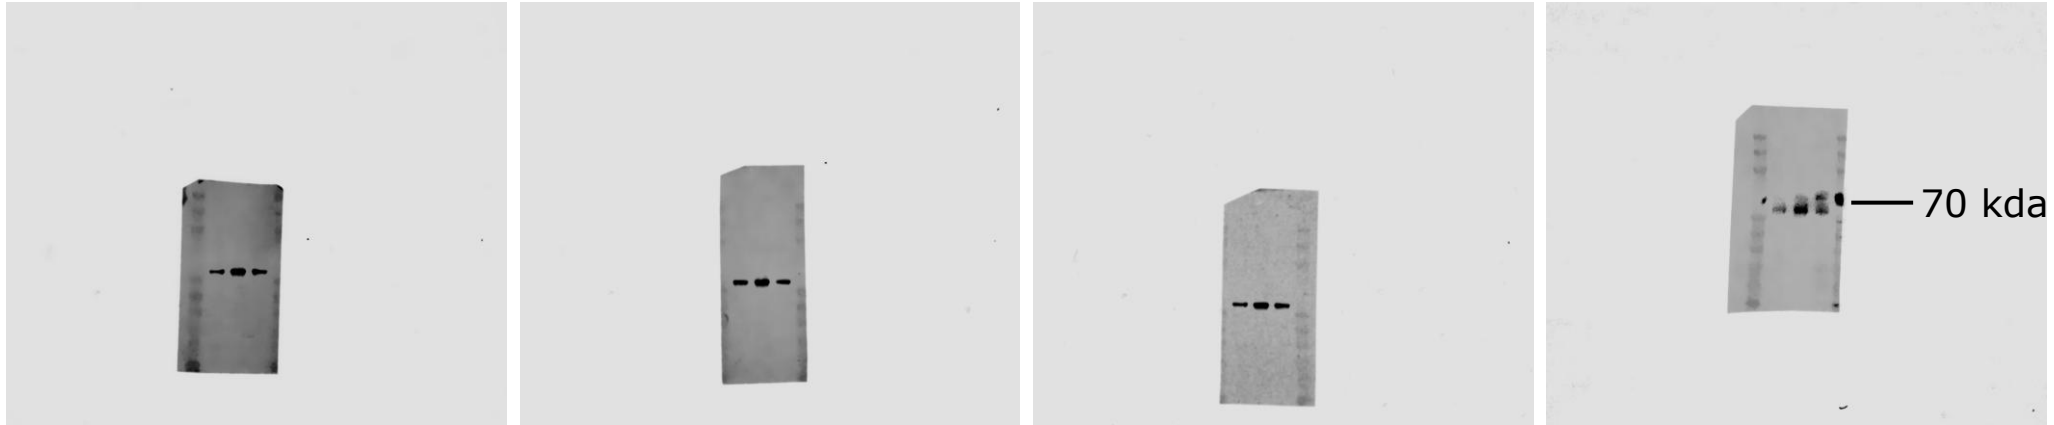

GAPDH

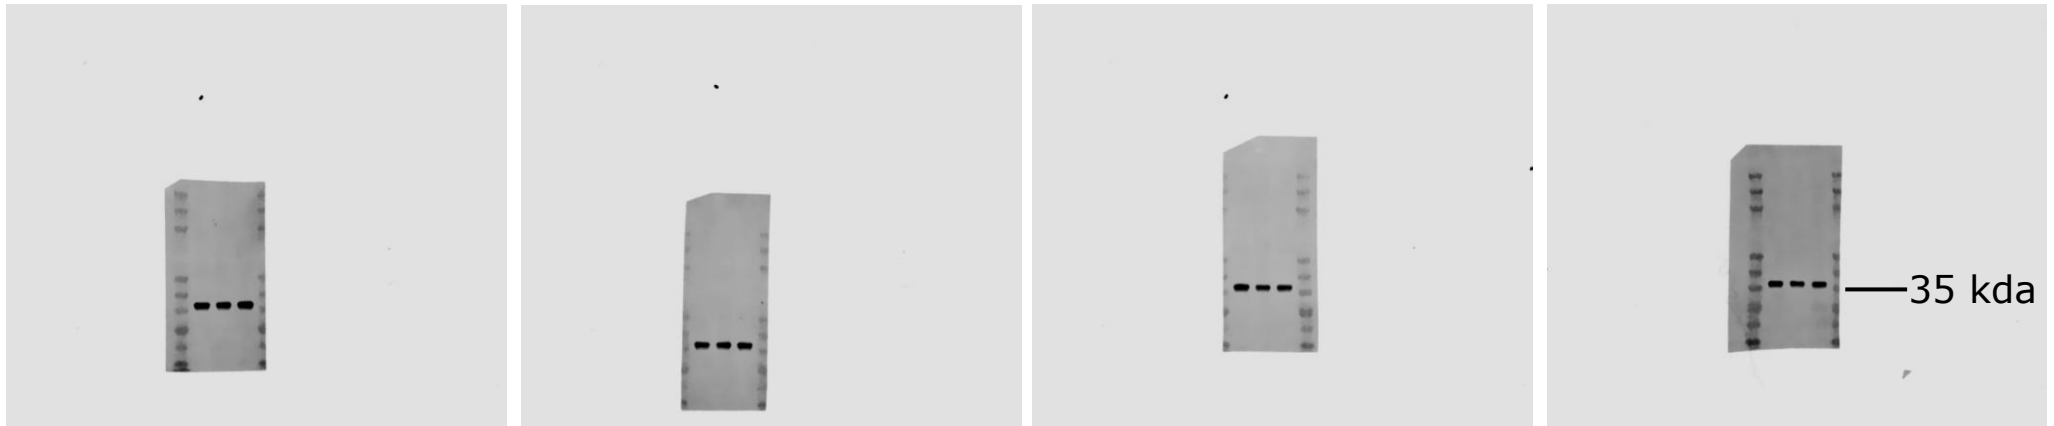

**Figure 5, K**

The Image captured by the LICOR instrument processed using Image Studio Ver 5.2.

Uncropped/unedited images↓



P-smad2

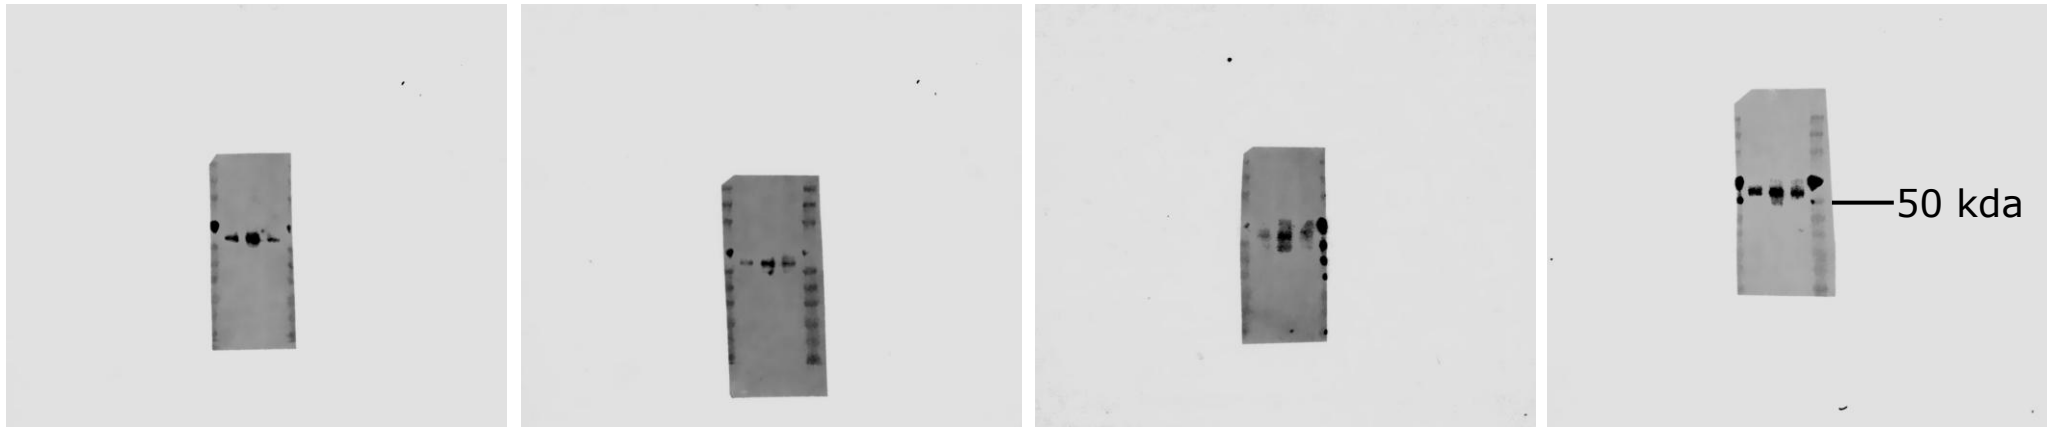

GAPDH

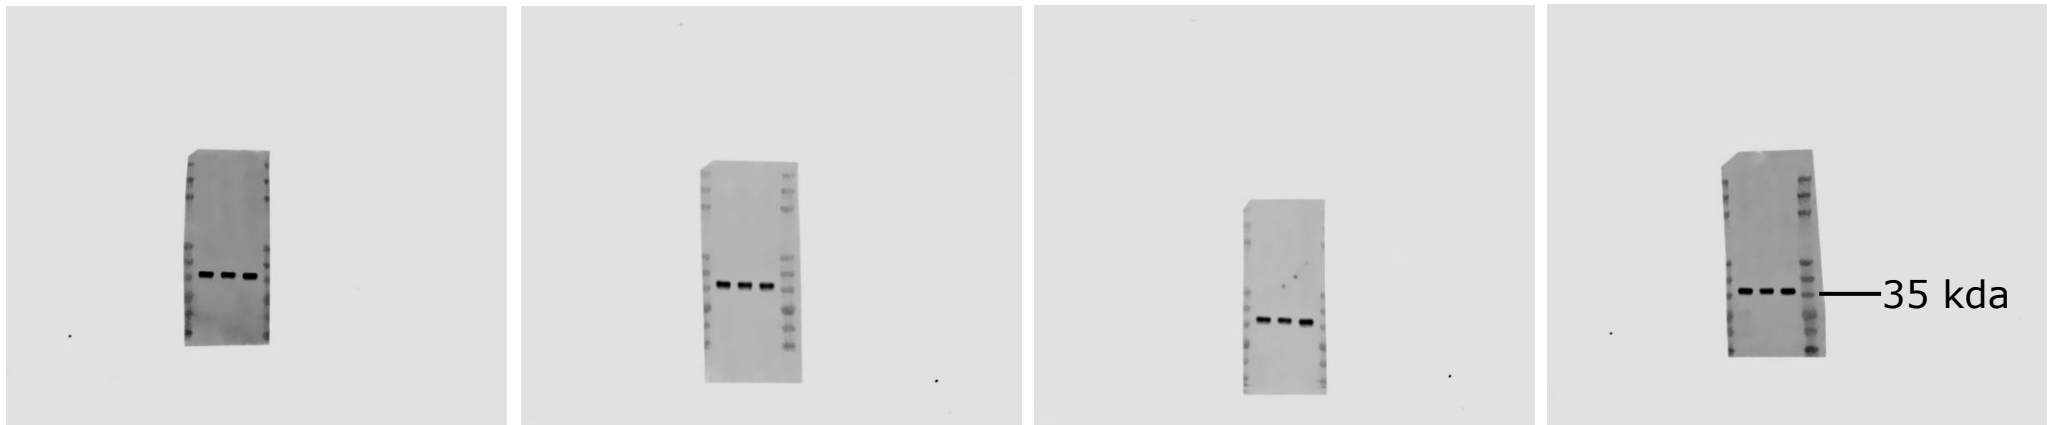

**Figure 5, K**

The Image captured by the LICOR instrument processed using Image Studio Ver 5.2.

Uncropped/unedited images↓



smad2

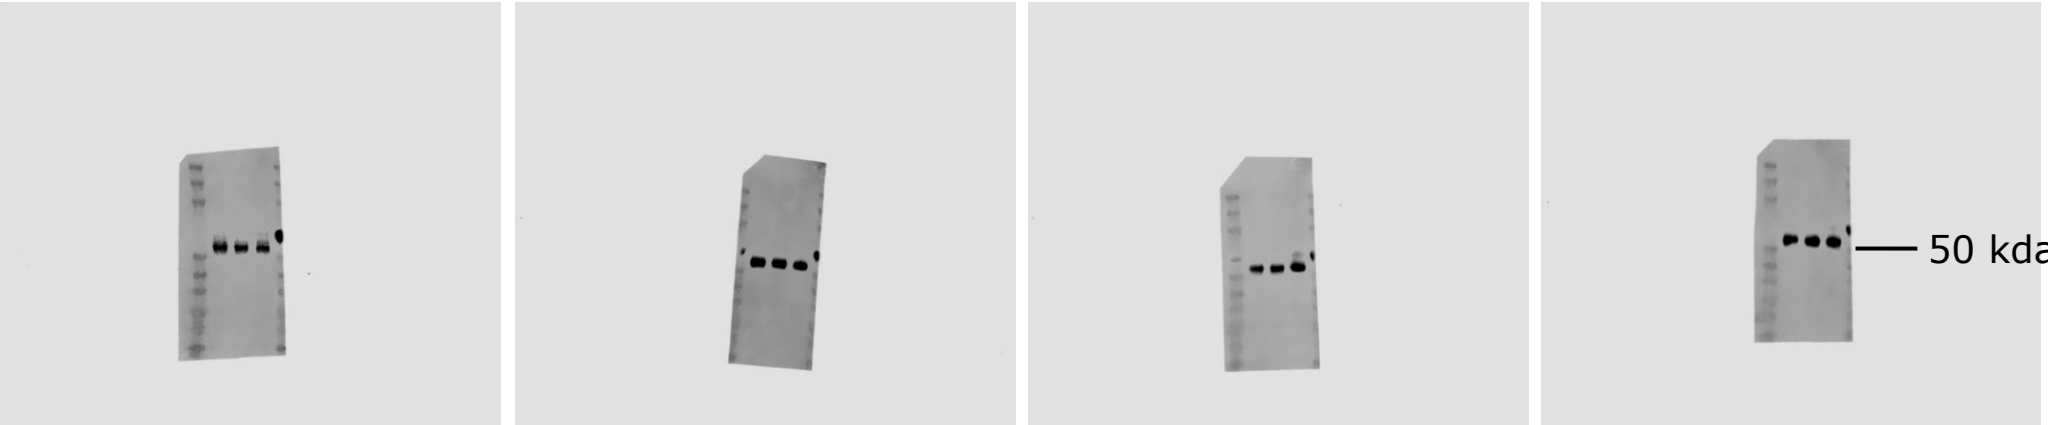

GAPDH

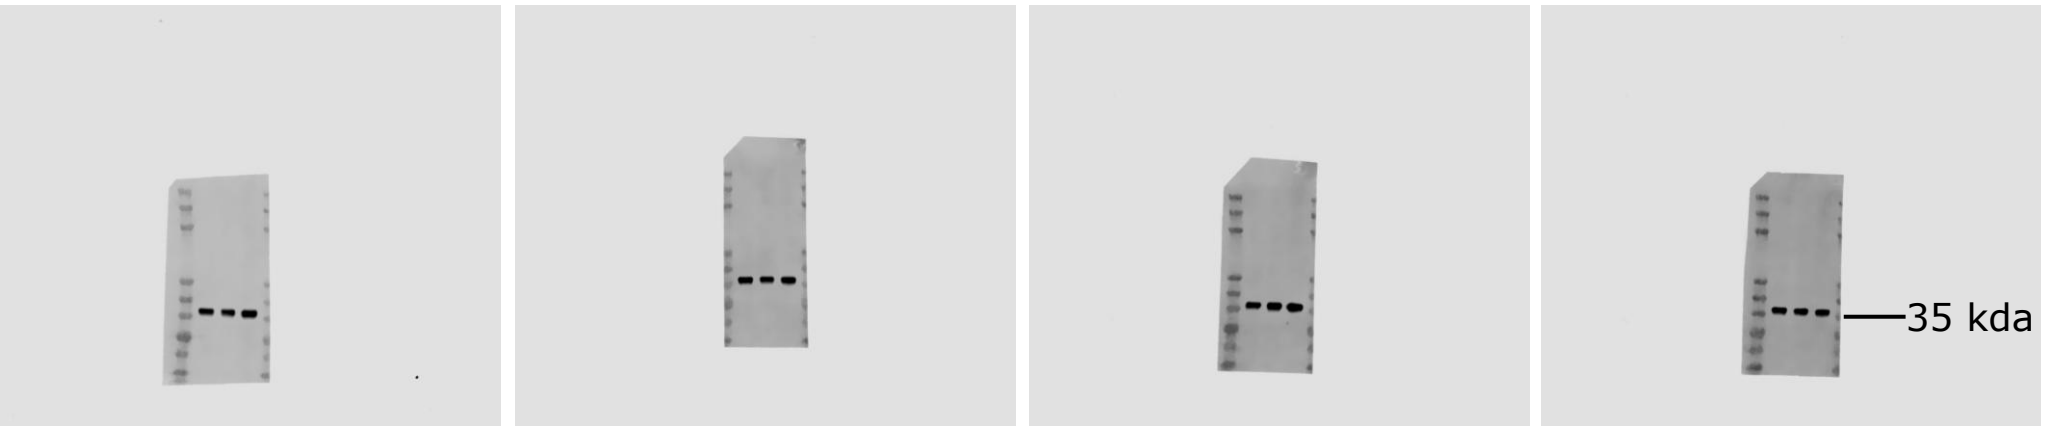

**Figure 5, K**

The Image captured by the LICOR instrument processed using Image Studio Ver 5.2.

Uncropped/unedited images↓



P-smad3

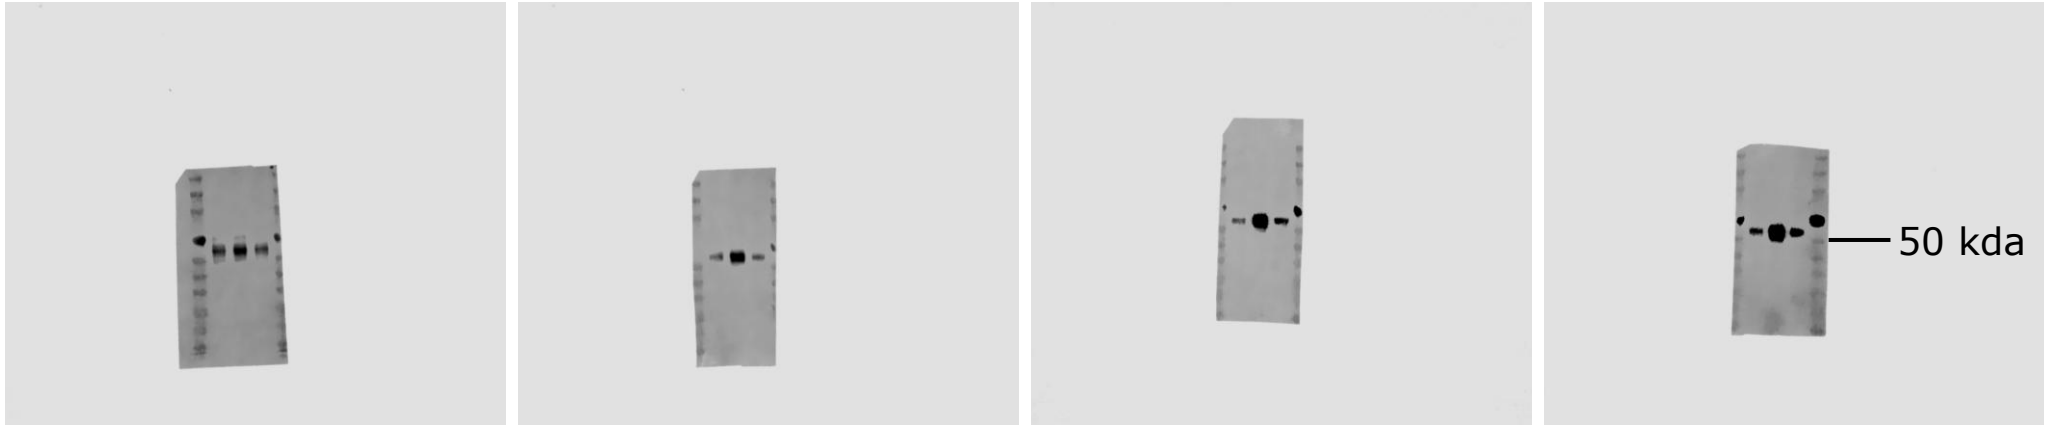

50 kda

GAPDH

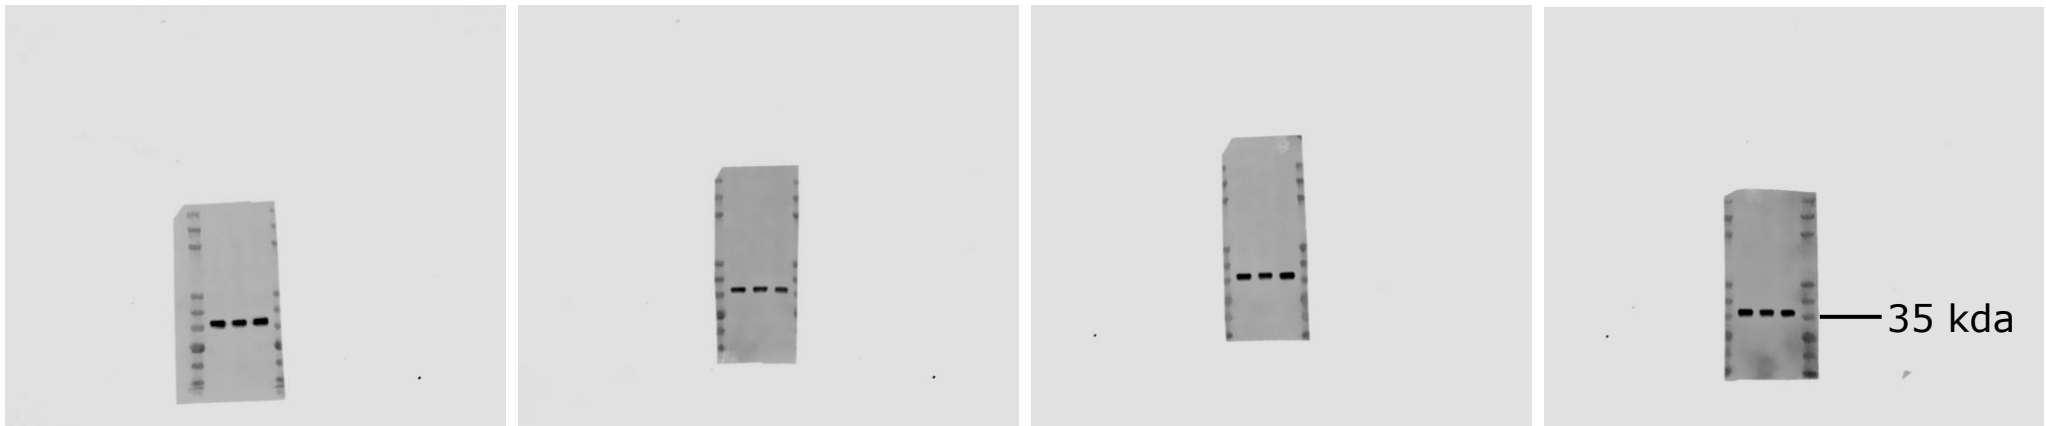

35 kda

# Figure 5, K

The Image captured by the LICOR instrument processed using Image Studio Ver 5.2.

Uncropped/unedited images↓



smad3

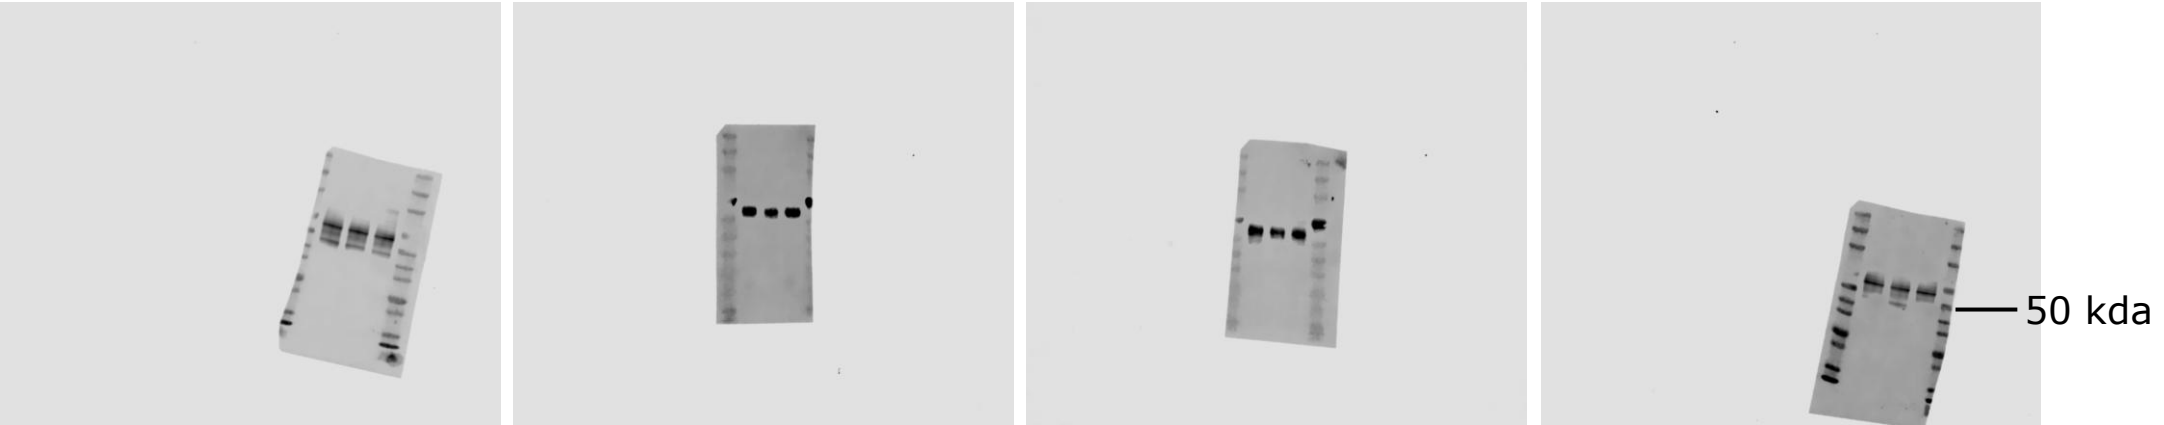

GAPDH

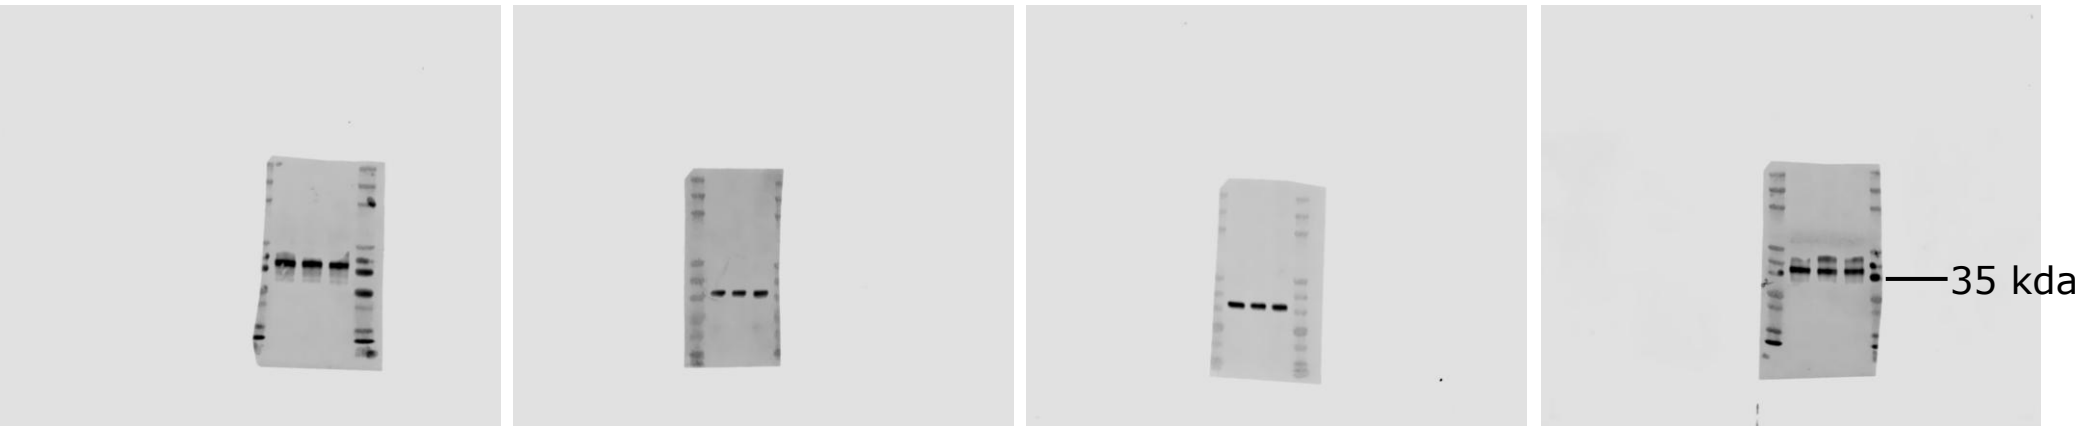

**Figure 5, K**

The Image captured by the LICOR instrument processed using Image Studio Ver 5.2.

Uncropped/unedited images↓

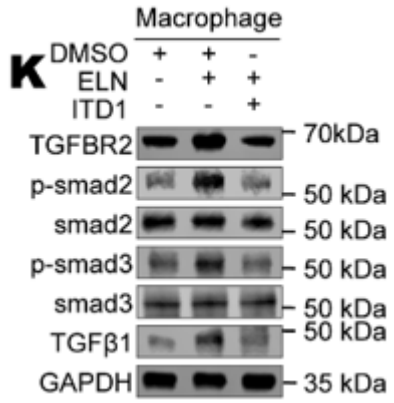

TGFβ1

50 kda

GAPDH

35 kda

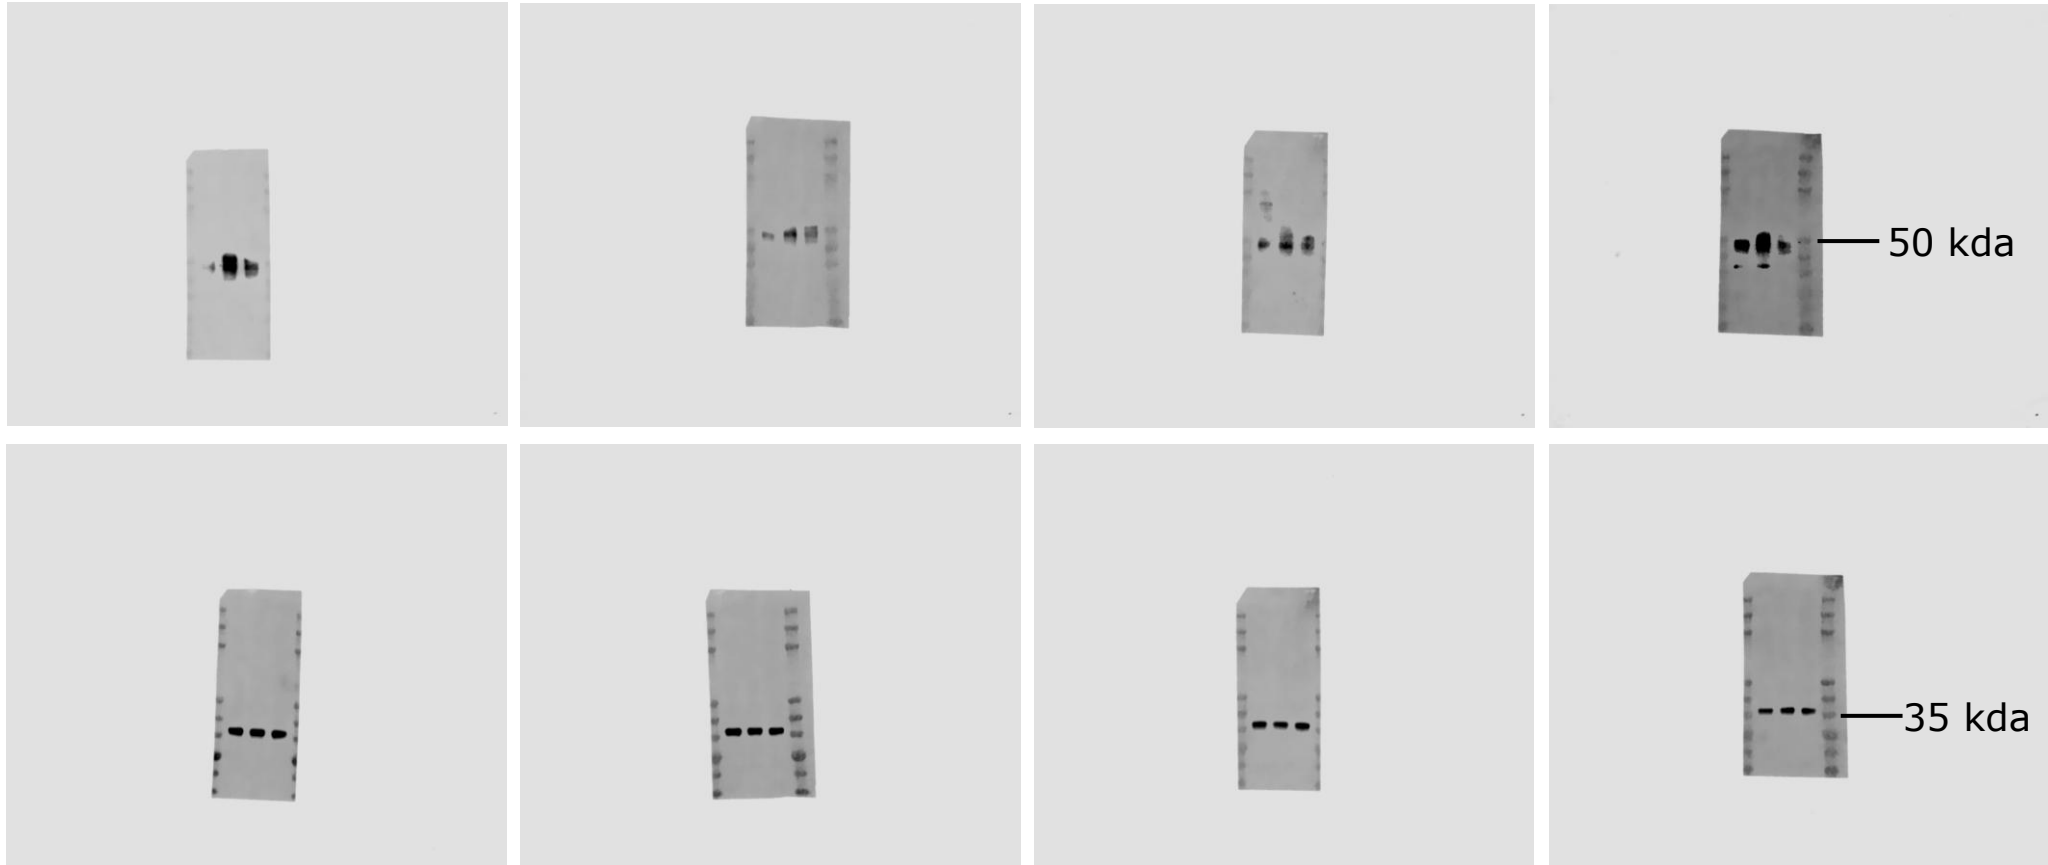

# Figure S6, D

The Image captured by the LICOR instrument processed using Image Studio Ver 5.2.

**D**

Uncropped/unedited images↓

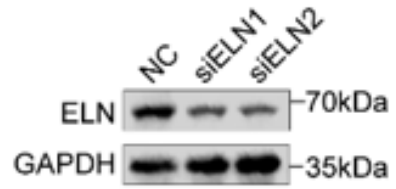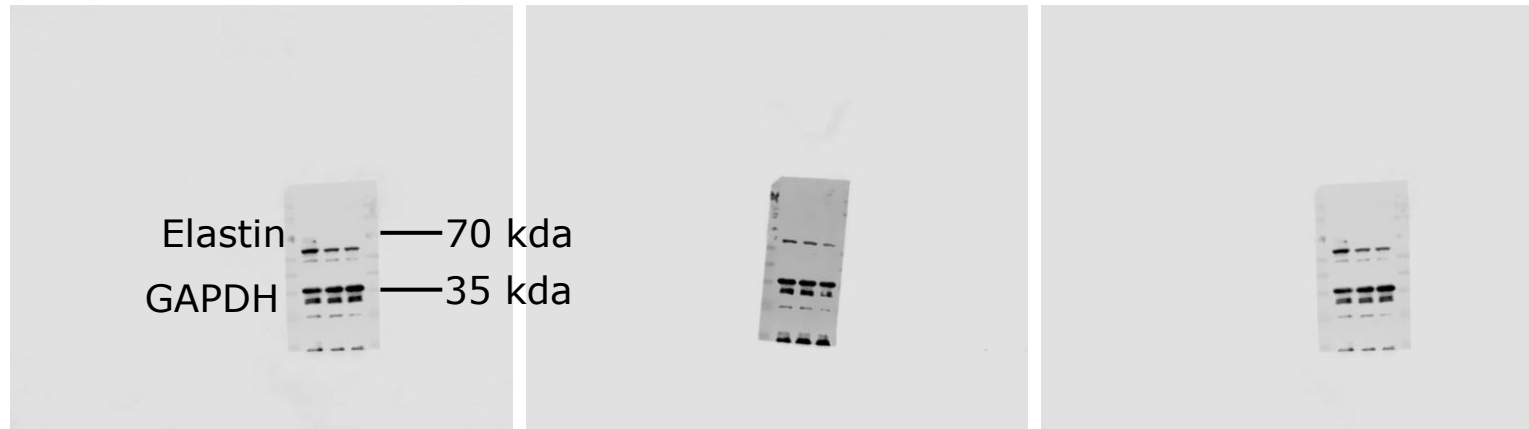

Supplement: sd2 [file 2]
